# Supplementary material
Source: PubMed Central journal article supplement (PMC4782720)
Supplement: ol6b00181_si_001.pdf [file ol6b00181_si_001.pdf]

## Supplemental Information for:

# Product rearrangement from altering a single residue in the rice *syn*-copalyl diphosphate synthase

Kevin C. Potter,<sup>†</sup> Meirong Jia,<sup>†</sup> Young J. Hong,<sup>‡</sup> Dean Tantillo<sup>‡</sup> and Reuben J. Peters<sup>†,\*</sup>

<sup>†</sup>Roy J. Carver Department of Biochemistry, Biophysics and Molecular Biology, Iowa State University, Ames, Iowa 50011 United States

<sup>‡</sup>Department of Chemistry, University of California, Davis, California 95616 United States

## Materials and Methods

All reagents were purchased from Fisher Scientific unless noted otherwise. Enzymes were characterized in a previously described modular metabolic engineering system in *E. coli*.<sup>1</sup> To increase carbon flux through the isoprenoid precursor pathway, a compatible plasmid (pIRS) was co-transformed into *E. coli*.<sup>2</sup> This system increases metabolic flux to yield more of the diterpene precursor, GGPP (**1**), produced by a GGPP synthase, which is co-expressed with OsCPS4 in pGG/DEST constructs created via recombination into the DESTination cassette by the Gateway cloning system (Invitrogen).<sup>2</sup> The recombinant enzymes used in this study were derived from a previously described pseudo-mature construct for OsCPS4.<sup>3</sup>

Mutants were generated by whole-plasmid PCR amplification with overlapping mutagenic primers of the previously described pENTR/SD/d-TOPO (Invitrogen) based clone of pseudo-mature OsCPS4,<sup>3</sup> each of which was verified by complete gene sequencing prior to transfer by directional recombination to the pGG-Dest expression vector. The constructs were transformed into the C41 OverExpress strain of *Escherichia coli* (Lucigen), along with pIRS, and heterologously expressed, much as previously described for other class II diterpene cyclases.<sup>4-6</sup> Briefly, the recombinant mutant clones were grown in liquid NZY media (10 g casein, 10 g NaCl, 5 g yeast extract, 1 g MgSO<sub>4</sub> (anhydrous) in 1 L H<sub>2</sub>O, and pH adjusted to 7.0) at 37 °C to OD<sub>600</sub> = 0.6, then transferred to 16 °C for an hour and induced with 0.5 mM IPTG. At the time of induction, cultures were supplemented with phosphate buffer (pH 7.0) to 100 mM, sodium pyruvate to 50 mM, and MgCl<sub>2</sub> to 1 mM (final concentrations), as previously described.<sup>2</sup> After 3 days fermentation at 16 °C, dephosphorylated enzymatic products were extracted by addition of equal volume of hexanes and gentle swirling, the organic solvent was separated out and then dried under N<sub>2</sub>, with the residue resuspended in fresh hexanes and analyzed by GC-MS. Note that dephosphorylation of the class II diterpene cyclases products reported here relied on the activity of endogenous phosphatases from *E. coli*. Compound analysis by GC-MS was carried out as previously described.<sup>7</sup> Briefly, using a 3900 GC with Saturn 2100T ion trap MS (Varian), equipped with a HP-5MS column (Agilent, 0.25 μm, 0.25 ID, 30 m) with a He flow rate of 1.2 mL/min, and the following oven temperature program: 50 °C for 3 min, 15 °C/min to 300 °C, hold 3 min. Samples (1 μL) were injected via splitless injection at 250 °C.

Given the somewhat surprising production of *syn*-CPP (**2**) by OsCPS4:H501Y, the absolute stereochemistry of this product was investigated by further co-expression of a subsequently acting class I diterpene synthase that is selective for **2**. Namely, the rice *syn*-stemarene/stemodene synthase OsKLS8.<sup>8</sup> This analysis indicated that OsCPS4:H501Y does selectively produce **2** – i.e., rather than the enantiomeric *ent-syn*-CPP – as OsKSL8 readily reacts with the product of this mutant (data not shown).

The dephosphorylated product of the OsCPS4:H501D mutant (**3'**) was purified much as previously described for other class II diterpene cyclase products.<sup>4-6</sup> To obtain sufficient quantities of the compound, 8 L of the relevant bacterial culture were grown as described above. After extraction, the phases were separated in a separatory funnel, and the pooled hexanes dried by rotary evaporation. The resulting extract was redissolved in 10 mL of fresh hexanes and fractionated over silica (4 g) using a Reveleris automated flash chromatography system (Grace, Deerfield, IL) with a 15 mL/min flow rate, 5 mL injections, and UV detection at 200 nm, with the following stepwise gradient: 0%, 5%, 15%, 25% ethyl acetate (in hexane) for 1 minute each, and a final wash with 100% ethyl acetate for 3 minutes. The resulting fractions were analyzed by GC-MS (as described above). Those containing **3'** were dried under N<sub>2</sub> and dissolved in 5 mL of 50% acetonitrile/dH<sub>2</sub>O. **3'** was then further purified via HPLC using an Agilent 1200 system equipped with an Agilent Poroshell 120 EC-C18 (4.6 x 100 mm, 4 μm) column at a flow rate of 1 mL/min. The column was pre-equilibrated, sample injected and washed with 50% acetonitrile/dH<sub>2</sub>O (0 - 2 minutes), eluted with 50 - 100% acetonitrile (2 - 7 minutes), and followed by a 100% acetonitrile wash (7 - 23 minutes), with peak based fraction collection. Again, those containing **3'** were identified by GC-MS analysis. The final yield of pure **3'** was estimated to be ~3.0 mg by GC-FID (flame ionization detection) analysis using a Agilent 6890N GC equipped with HP-5 column and the same temperature program described above, with comparison to a standard curve generated for the diterpene cembrene, as previously described.<sup>2</sup>

The HPLC fractions containing pure **3'** were pooled, dried under N<sub>2</sub> and dissolved in 0.5 mL CDCl<sub>3</sub> (Aldrich). NMR spectra were acquired on a Bruker AVIII-800 spectrometer equipped with a 5-mm HCN cryogenic probe, using TopSpin 3.2 software. Analysis was carried out at 25 °C. Chemical shifts were calculated by reference to those known for CDCl<sub>3</sub> signals offset from TMS (<sup>13</sup>C 77.23 ppm, <sup>1</sup>H 7.24 ppm). All spectra were acquired using standard programs from the TopSpin 3.2 software, with collection of 1D <sup>1</sup>H-NMR, and 2D double-quantum filtered correlation spectroscopy (DQF-COSY), heteronuclear single-quantum coherence (HSQC), heteronuclear multiple-bond correlation (HMBC), HMQC-COSY and NOESY (800 MHz), as well as 1D <sup>13</sup>C-NMR (201 MHz), spectra. Observed HMBC correlations were used to propose a partial structure, while COSY correlations between protonated carbons were used to complete the structure, which was further verified by HSQC correlations. Observed correlations from NOESY spectrum were used to assign the relative stereochemistry of chiral carbons and also verify the configuration of the *exo*-cyclic double bond.

## Quantum Chemical Calculations

Calculations were performed with GAUSSIAN03<sup>9</sup> and GAUSSIAN09.<sup>10</sup> Geometries were optimized using the B3LYP method with the basis set of 6-31+G(d,p) in the absence and 6-31G(d) in the presence of theozymes.<sup>11</sup> All stationary points were characterized as minima or transition state structures using frequency calculations at the same level. All reported energies include zero-point energy corrections (unscaled) from the frequency calculations at the same level. Intrinsic reaction coordinate (IRC) calculations were used for further characterization of transition state structures.<sup>12</sup> mPW1PW91<sup>13</sup> single point energies are also shown, since it is known that B3LYP underestimates the relative energies of cyclic structures versus acyclic isomers.<sup>13</sup> The validity of this computational approach for examining terpene-forming carbocation rearrangements is well-established.<sup>14</sup> Structural images were created with *Ball&Stick*.<sup>15</sup>

## References

1. Cyr, A.; Wilderman, P. R.; Determan, M.; Peters, R. J., *J. Am. Chem. Soc.* **2007**, *129*, 6684-6685.
2. Morrone, D.; Lowry, L.; Determan, M. K.; Hershey, D. M.; Xu, M.; Peters, R. J., *Appl. Microbiol. Biotechnol.* **2010**, *85*, 1893-1906.
3. Xu, M.; Hillwig, M. L.; Pristic, S.; Coates, R. M.; Peters, R. J., *Plant J.* **2004**, *39*, 309-318.
4. Criswell, J.; Potter, K.; Shephard, F.; Beale, M. B.; Peters, R. J., *Org. Lett.* **2012**, *14*, 5828-5831.
5. Potter, K.; Criswell, J.; Peters, R. J., *Angew. Chem. Int. Ed.* **2014**, *53*, 7198-7202.
6. Potter, K. C.; Zi, J.; Hong, Y. J.; Schulte, S.; Malchow, B.; Tantillo, D. J.; Peters, R. J., *Angew. Chem. Int. Ed.* **2016**, *55*, 634-638.
7. Morrone, D.; Chen, X.; Coates, R. M.; Peters, R. J., *Biochem. J.* **2010**, *431*, 337-344.
8. Xu, M.; Wilderman, P. R.; Morrone, D.; Xu, J.; Roy, A.; Margis-Pinheiro, M.; Upadhyaya, N.; Coates, R. M.; Peters, R. J., *Phytochemistry* **2007**, *68*, 312-326.
9. Gaussian 03, Revision D.01, M. J. Frisch, G. W. Trucks, H. B. Schlegel, G. E. Scuseria, M. A. Robb, J. R. Cheeseman, J. A. Montgomery, Jr., T. Vreven, K. N. Kudin, J. C. Burant, J. M. Millam, S. S. Iyengar, J. Tomasi, V. Barone, B. Mennucci, M. Cossi, G. Scalmani, N. Rega, G. A. Petersson, H. Nakatsuji, M. Hada, M. Ehara, K. Toyota, R. Fukuda, J. Hasegawa, M. Ishida, T. Nakajima, Y. Honda, O. Kitao, H. Nakai, M. Klene, X. Li, J. E. Knox, H. P. Hratchian, J. B. Cross, V. Bakken, C. Adamo, J. Jaramillo, R. Gomperts, R. E. Stratmann, O. Yazyev, A. J. Austin, R. Cammi, C. Pomelli, J. W. Ochterski, P. Y. Ayala, K. Morokuma, G. A. Voth, P. Salvador, J. J. Dannenberg, V. G. Zakrzewski, S. Dapprich, A. D. Daniels, M. C. Strain, O. Farkas, D. K. Malick, A. D. Rabuck, K. Raghavachari, J. B. Foresman, J. V. Ortiz, Q. Cui, A. G. Baboul, S. Clifford, J. Cioslowski, B. B. Stefanov, G. Liu, A. Liashenko, P. Piskorz, I. Komaromi, R. L. Martin, D. J. Fox, T. Keith, M. A. Al-Laham, C. Y. Peng, A. Nanayakkara, M. Challacombe, P. M. W. Gill, B. Johnson, W. Chen, M. W. Wong, C. Gonzalez, and J. A. Pople, Gaussian, Inc., Wallingford CT, 2004.
10. Gaussian 09, Revision D.01, M. J. Frisch, G. W. Trucks, H. B. Schlegel, G. E. Scuseria, M. A. Robb, J. R. Cheeseman, G. Scalmani, V. Barone, B. Mennucci, G. A. Petersson, H. Nakatsuji, M. Caricato, X. Li, H. P. Hratchian, A. F. Izmaylov, J. Bloino, G. Zheng, J. L. Sonnenberg, M. Hada, M. Ehara, K. Toyota, R. Fukuda, J. Hasegawa, M. Ishida, T. Nakajima, Y. Honda, O. Kitao, H. Nakai, T. Vreven, J. A. Montgomery, Jr., J. E. Peralta, F. Ogliaro, M. Bearpark, J. J. Heyd, E. Brothers, K. N. Kudin, V. N. Staroverov, T. Keith, R. Kobayashi, J. Normand, K. Raghavachari, A. Rendell, J. C. Burant, S. S. Iyengar, J. Tomasi, M. Cossi, N. Rega, J. M. Millam, M. Klene, J. E. Knox, J. B. Cross, V. Bakken, C. Adamo, J. Jaramillo, R. Gomperts, R. E. Stratmann, O. Yazyev, A. J. Austin, R. Cammi, C. Pomelli, J. W. Ochterski, R. L. Martin, K. Morokuma, V. G. Zakrzewski, G. A. Voth, P. Salvador, J. J. Dannenberg, S. Dapprich, A. D. Daniels, O. Farkas, J. B. Foresman, J. V. Ortiz, J. Cioslowski, and D. J. Fox, Gaussian, Inc., Wallingford CT, 2013.
11. (a) A. D. Becke, *J. Chem. Phys.* **1993**, *98*, 1372-1377. (b) A. D. Becke, *J. Chem. Phys.* **1993**, *98*, 5648-5652. (c) C. Lee, W. Yang, R. G. Parr, *Phys. Rev. B* **1988**, *37*, 785-789. (d) P. J. Stephens, F. J. Devlin, C. F. Chabalowski, M. J. Frisch, *J. Phys. Chem.* **1994**, *98*, 11623-11627. (e) J. Tirado-Rives, W. L. Jorgensen, *J. Chem. Theory Comput.* **2008**, *4*, 297-306.
12. (a) C. Gonzalez, H. B. Schlegel, *J. Phys. Chem.* **1990**, *94*, 5523-5527. (b) K. Fukui, *Acc. Chem. Res.* **1981**, *14*, 363-368.
13. S. P. T. Matsuda, W. K. Wilson, Q. Xiong, *Org. Biomol. Chem.* **2006**, *4*, 530-543.
14. D. J. Tantillo, *Nat. Prod. Rep.* **2011**, *28*, 1035-1053. This is part 10 of our series on theoretical studies of diterpene-forming carbocation rearrangements. For part 9 see ref 6.
15. N. Muller, A. Falk, Johannes Kepler University Linz, 2004.

**Scheme S1:** Cyclization of **1** to a labdaenyl<sup>+</sup> intermediate, which can undergo sequential 1,2-shifts of a hydride (C9 → C8) and methyl (C10 → C9), with the latter (red arrow) creating a structurally distinct halimaenyl<sup>+</sup> intermediate that can, in turn, also undergo sequential 1,2-shifts of a hydride (C5 → C10) and methyl (C4 → C5), again with the latter (red arrow) creating the structurally distinct clerodanenyl<sup>+</sup> intermediate.

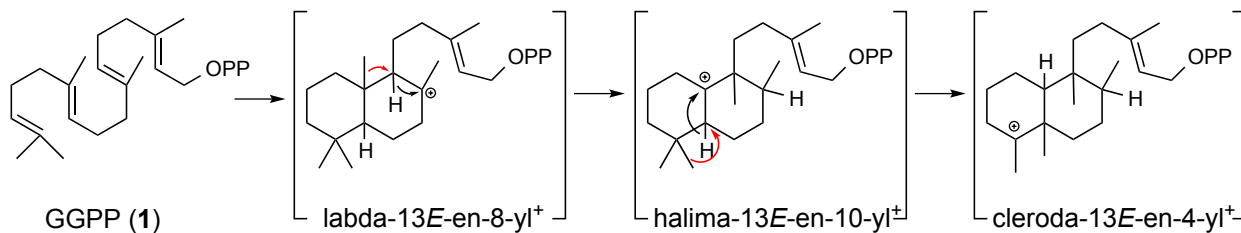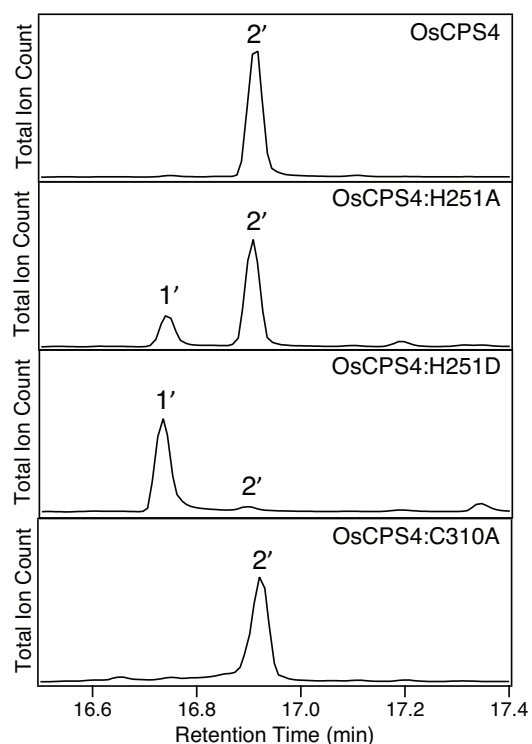

**Figure S1:** GC-MS chromatograms for dephosphorylated products from OsCPS4 mutants (as indicated) corresponding to the catalytic general base dyad conserved in CPSs from gibberellin phytohormone biosynthesis. Product numbering as in text, with prime' notation indicating that these are dephosphorylated derivatives.

**Figure S2:** GC-MS chromatograms for dephosphorylated products from OsCPS4 mutants (as indicated) of putative active site histidine (H275) identified by molecular modeling (see Figure 1). Product numbering as in text, with prime' notation indicating that these are dephosphorylated derivatives.

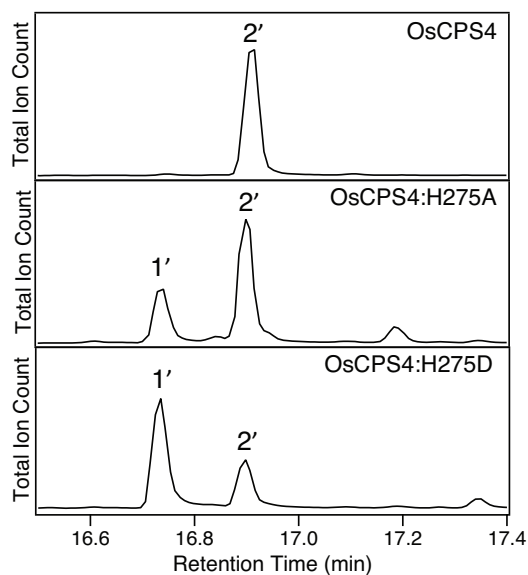

**Table S1:**  $^1\text{H}$  and  $^{13}\text{C}$  NMR assignments for *syn*-halima-5,13*E*-dien-15-ol (**3'**) in  $\text{CDCl}_3$

Note: The chemical shift values of C11 and C20 were determined by HSQC and HMBC, respectively, due to low  $^{13}\text{C}$  signal.

| Position | <i>syn</i> -halima-5,13 <i>E</i> -dien-15-ol ( <b>3'</b> ) |                     |
|----------|------------------------------------------------------------|---------------------|
|          | $\delta_{\text{H}}$                                        | $\delta_{\text{C}}$ |
| 1 a      | 1.75 (1H, m)                                               | 29.2                |
| b        | 1.05 (1H, m)                                               |                     |
| 2        | 1.60 (2H, m)                                               | 23.3                |
| 3 a      | 1.43 (1H, m)                                               | 42.4                |
| b        | 1.18 (1H, m)                                               |                     |
| 4        |                                                            | 36.9                |
| 5        |                                                            | 146.9               |
| 6        | 5.32 (1H, t, $J = 3.4$ Hz)                                 | 114.7               |
| 7 a      | 2.05 (1H, d, $J = 12.0$ Hz)                                | 31.3                |
| b        | 1.68 (1H, m)                                               |                     |
| 8        | 1.63 (1H, m)                                               | 33.2                |
| 9        |                                                            | 36.2                |
| 10       | 1.98 (1H, d, $J = 12.6$ Hz)                                | 41.2                |
| 11 a     | 1.42 (1H, m)                                               | 32.2                |
| b        | 1.26 (1H, m)                                               |                     |
| 12       | 1.92 (2H, m)                                               | 33.9                |
| 13       |                                                            | 141.6               |
| 14       | 5.39 (1H, tq, $J = 6.99, 1.18$ Hz)                         | 123.2               |
| 15       | 4.12 (2H, d, $J = 6.99$ Hz)                                | 59.8                |
| 16       | 1.66 (3H, s)                                               | 16.7                |
| 17       | 0.78 (3H, d, $J = 6.8$ Hz)                                 | 14.8                |
| 18       | 1.04 (3H, s)                                               | 29.7                |
| 19       | 1.02 (3H, s)                                               | 27.1                |
| 20       | 0.81 (3H, s)                                               | 22.4                |

**Figure S3:**  $^1\text{H}$  spectra obtained for *syn*-halima-5,13*E*-dien-15-ol (**3'**) purified as the dephosphorylated product of the OsCPS4:H501D mutant. Carbon numbering and HMBC correlation and NOESY Nuclear Overhauser Effect correlations used to assign configurations.

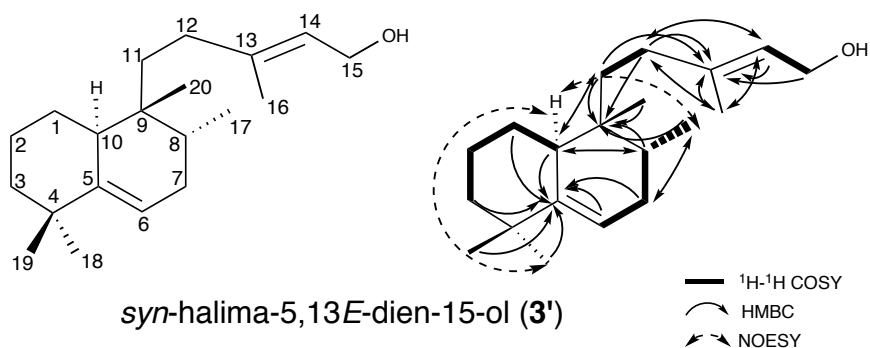

Figure S4:  $^1\text{H}$  Spectrum of *syn*-halima-5,13*E*-dien-15-ol (**3'**).

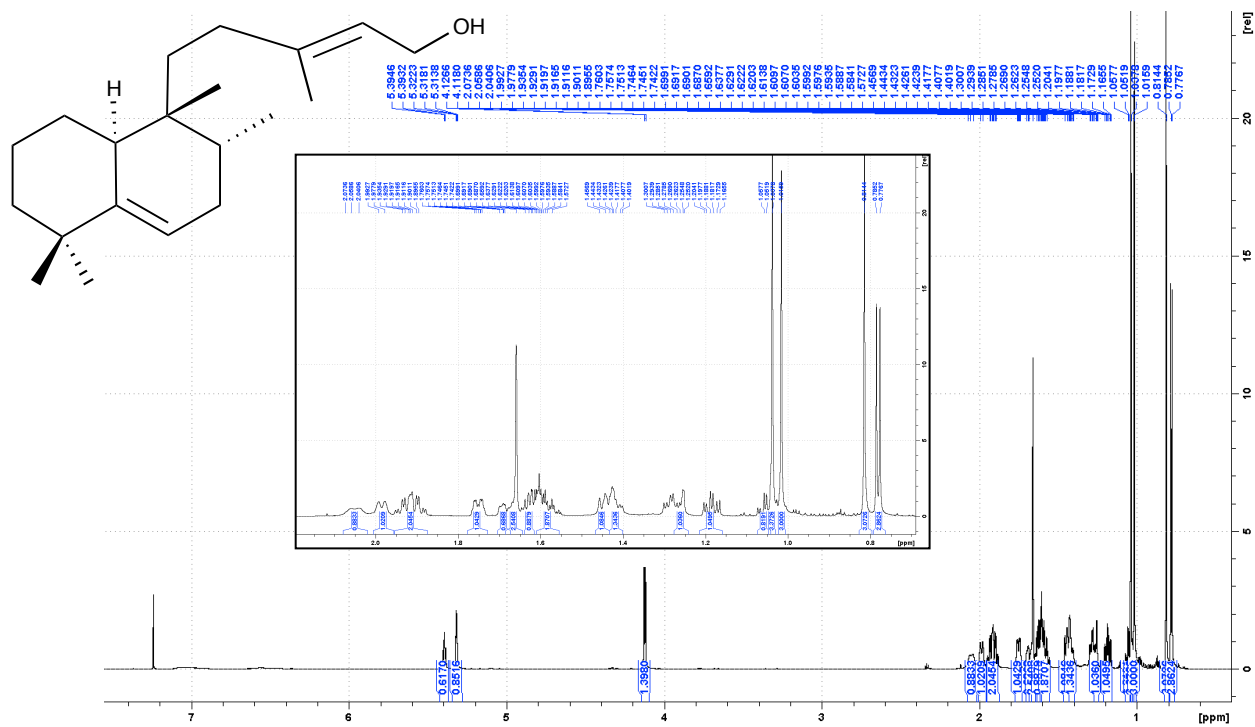

Figure S5:  $^{13}\text{C}$  Spectrum of *syn*-halima-5,13*E*-dien-15-ol (**3'**).

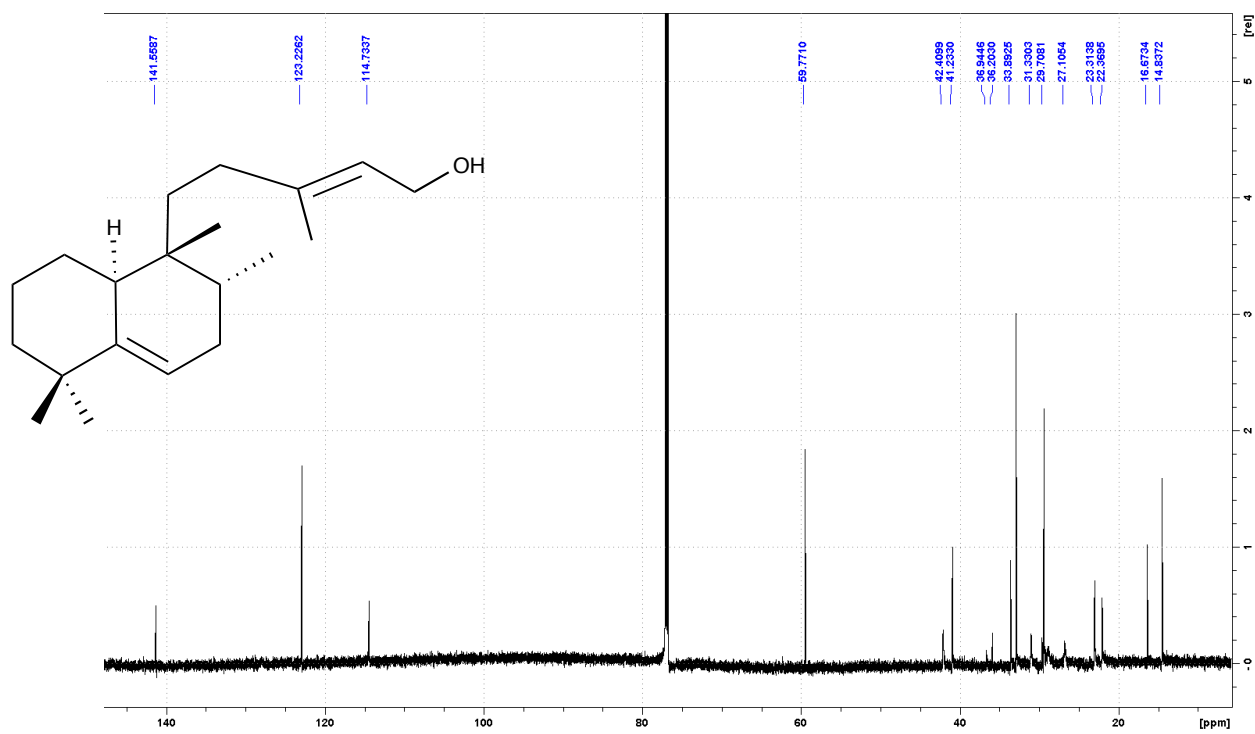

**Figure S6.** Carbocationic rearrangements of GGPP (monophosphate instead of diphosphate is used in the calculations, B3LYP/6-31+G(d,p)). Computed energies (in kcal/mol) from B3LYP/6-31+G(d,p)//B3LYP/6-31+G(d,p) in normal texts and mpw1pw91/6-31+G(d,p)//B3LYP/6-31+G(d,p) in brackets are shown. All energies include zero point energy corrections from frequency calculations using the B3LYP/6-31+G(d,p) method.

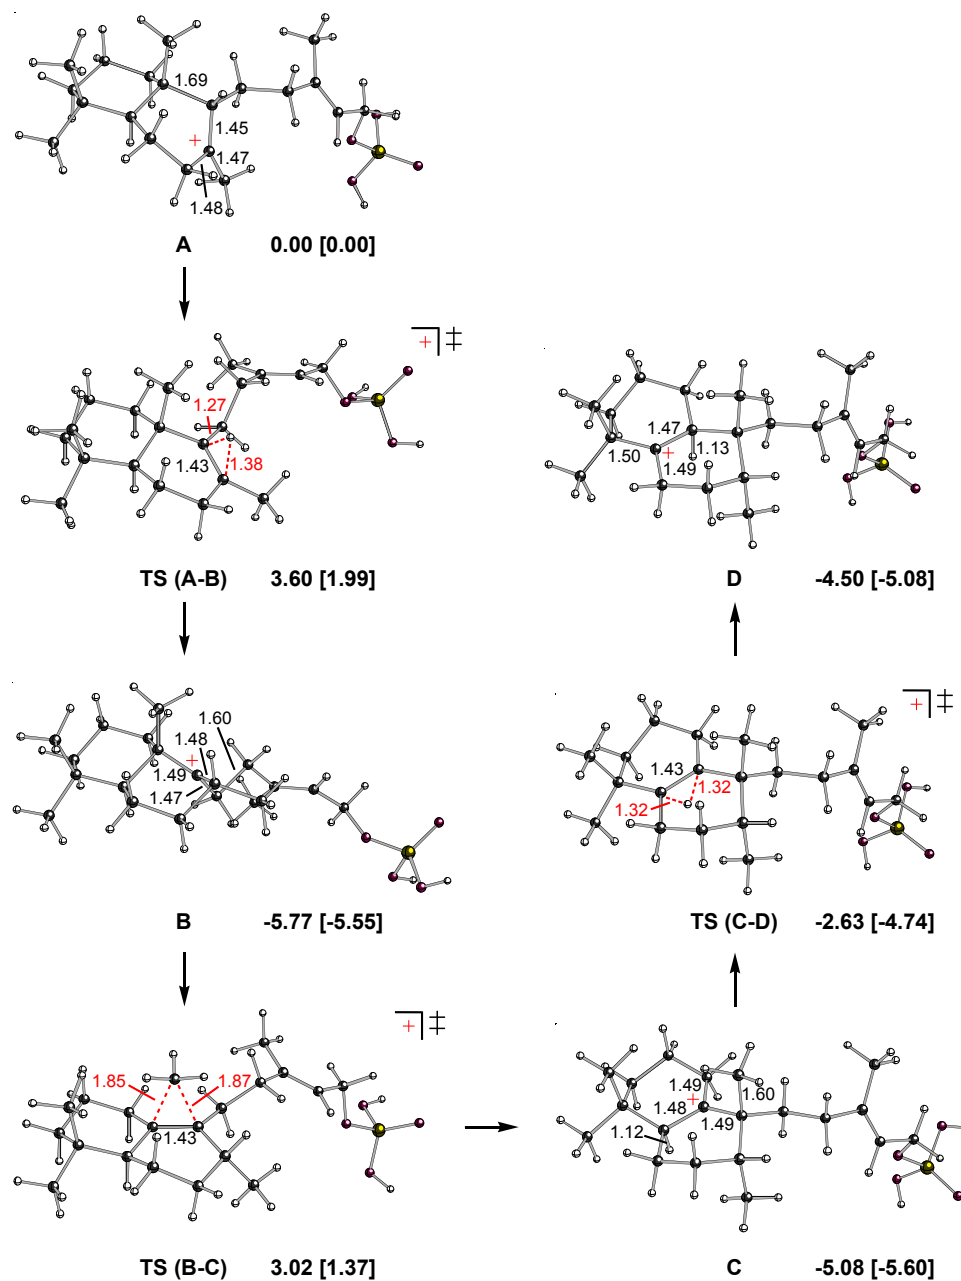

**Figure S7.** Conversion of cation **D** to cation **E** (monophosphate instead of diphosphate is used in the calculations, B3LYP/6-31+G(d,p)). Computed energies (in kcal/mol) from B3LYP/6-31+G(d,p)//B3LYP/6-31+G(d,p) in normal texts and mpw1pw91/6-31+G(d,p)//B3LYP/6-31+G(d,p) in brackets are shown. All energies include zero point energy corrections from frequency calculations using the B3LYP/6-31+G(d,p) method.

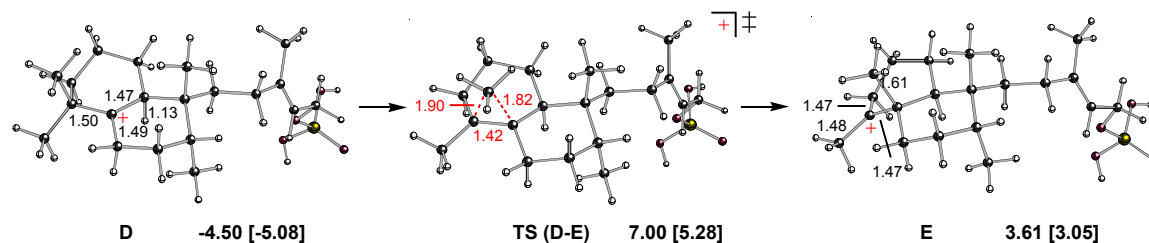

**Figure S8.** Conversion of cation **D'** (conformational isomer of **D**) to cation **F** via alternative geminal methyl shift (monophosphate instead of diphosphate is used in the calculations, B3LYP/6-31+G(d,p)). Computed energies (in kcal/mol) from B3LYP/6-31+G(d,p)//B3LYP/6-31+G(d,p) in normal texts and mpw1pw91/6-31+G(d,p)//B3LYP/6-31+G(d,p) in brackets are shown. All energies include zero point energy corrections from frequency calculations using the B3LYP/6-31+G(d,p) method.

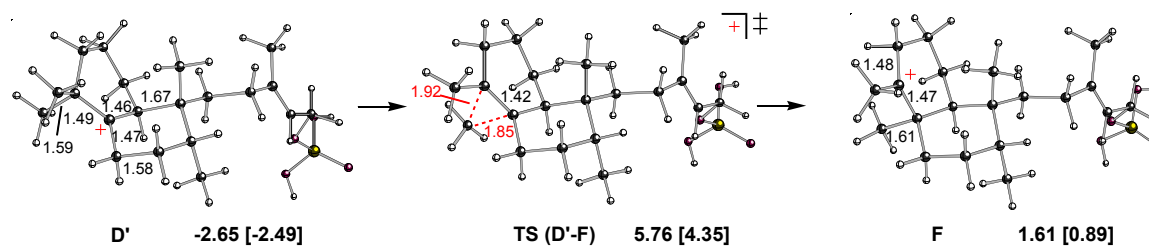



### Coordinates and Energies for structures shown in Figures 3 & S6 – S8.

Computed structures where selected distances are shown in Å.

A

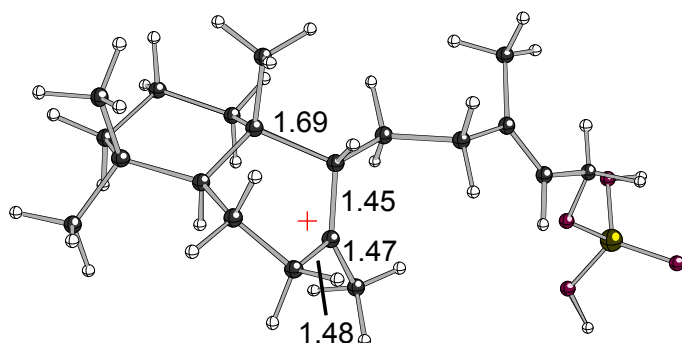

B3LYP/6-31+G(d,p)//B3LYP/6-31+G(d,p):

HF = -1425.9464979 hartrees (-894795.686897229 kcal/mol)

Imaginary Frequencies: none found

Zero-point correction = 0.537617 (Hartree/Particle)

mPW1PW91/6-31+G(d,p)//B3LYP/6-31+G(d,p):

HF = -1425.6967572 hartrees (-894638.972110572 kcal/mol)

Coordinates (from last standard orientation):

| Center Number | Atomic Number | Coordinates (Angstroms) |           |           |
|---------------|---------------|-------------------------|-----------|-----------|
|               |               | X                       | Y         | Z         |
| 1             | 6             | 0.577265                | -2.194328 | -0.379519 |
| 2             | 6             | -2.034815               | 1.347250  | -1.105870 |
| 3             | 6             | 1.665291                | 0.104610  | -0.828716 |
| 4             | 6             | 1.635672                | -1.341756 | -0.947168 |
| 5             | 1             | -0.406050               | -1.724482 | -0.344609 |
| 6             | 6             | 0.375132                | 0.819158  | -0.410404 |
| 7             | 6             | -0.663139               | 0.879996  | -1.558950 |
| 8             | 6             | 3.056959                | 0.589661  | -0.002443 |
| 9             | 1             | -0.064267               | 0.339221  | 0.470789  |
| 10            | 1             | 1.961324                | 0.434952  | -1.838555 |
| 11            | 1             | 0.536230                | -3.179925 | -0.849952 |
| 12            | 1             | 0.622481                | 1.837442  | -0.102591 |
| 13            | 6             | 2.783150                | -1.986962 | -1.625945 |
| 14            | 1             | 2.476151                | -2.075272 | -2.686107 |
| 15            | 1             | 2.883365                | -3.021852 | -1.277089 |
| 16            | 6             | 4.100775                | -1.196839 | -1.475603 |
| 17            | 1             | 4.202259                | -0.427611 | -2.248522 |
| 18            | 1             | 4.930318                | -1.890854 | -1.620155 |
| 19            | 6             | 4.081044                | -0.580211 | -0.062387 |
| 20            | 1             | 3.635361                | -1.361981 | 0.578581  |

|    |    |           |           |           |
|----|----|-----------|-----------|-----------|
| 21 | 6  | 2.745317  | 0.870073  | 1.480414  |
| 22 | 1  | 2.047596  | 1.705503  | 1.589379  |
| 23 | 1  | 2.271611  | -0.008854 | 1.938127  |
| 24 | 6  | 5.453368  | -0.326188 | 0.647000  |
| 25 | 6  | 5.114086  | 0.092390  | 2.106881  |
| 26 | 1  | 4.764052  | -0.800678 | 2.643890  |
| 27 | 1  | 6.035654  | 0.406667  | 2.610746  |
| 28 | 6  | 4.050997  | 1.190371  | 2.246005  |
| 29 | 1  | 4.448456  | 2.155628  | 1.914557  |
| 30 | 1  | 3.801524  | 1.321435  | 3.304765  |
| 31 | 6  | 3.466175  | 1.885753  | -0.731052 |
| 32 | 1  | 3.889363  | 1.691761  | -1.720881 |
| 33 | 1  | 2.599278  | 2.540832  | -0.858892 |
| 34 | 1  | 4.203113  | 2.451062  | -0.164117 |
| 35 | 6  | 6.376028  | 0.702010  | -0.042400 |
| 36 | 1  | 6.046535  | 1.734521  | 0.076530  |
| 37 | 1  | 7.378491  | 0.636566  | 0.392273  |
| 38 | 1  | 6.476835  | 0.500600  | -1.114630 |
| 39 | 6  | 6.228195  | -1.663120 | 0.715655  |
| 40 | 1  | 7.071307  | -1.564037 | 1.406618  |
| 41 | 1  | 5.599918  | -2.483803 | 1.081901  |
| 42 | 1  | 6.644685  | -1.953561 | -0.253980 |
| 43 | 1  | -0.763481 | -0.105807 | -2.029786 |
| 44 | 1  | -0.275637 | 1.553185  | -2.337957 |
| 45 | 6  | -3.064170 | 0.485280  | -1.156073 |
| 46 | 6  | -4.486634 | 0.724597  | -0.758790 |
| 47 | 1  | -4.647781 | 1.701196  | -0.298081 |
| 48 | 1  | -2.885597 | -0.520913 | -1.535073 |
| 49 | 1  | -5.150362 | 0.627177  | -1.626560 |
| 50 | 1  | 0.875930  | -2.364595 | 0.673359  |
| 51 | 6  | -2.119875 | 2.781559  | -0.643343 |
| 52 | 1  | -3.113874 | 3.058493  | -0.291159 |
| 53 | 1  | -1.416520 | 2.981358  | 0.173906  |
| 54 | 1  | -1.856899 | 3.463086  | -1.462609 |
| 55 | 8  | -4.832291 | -0.307896 | 0.208314  |
| 56 | 8  | -6.231876 | -1.698628 | 1.689430  |
| 57 | 15 | -6.379114 | -0.560518 | 0.560196  |
| 58 | 8  | -7.303464 | -0.886641 | -0.551860 |
| 59 | 8  | -6.729599 | 0.790246  | 1.374898  |
| 60 | 1  | -6.720535 | -2.497176 | 1.440163  |
| 61 | 1  | -7.681225 | 0.972033  | 1.392766  |

---

### TS (A-B)

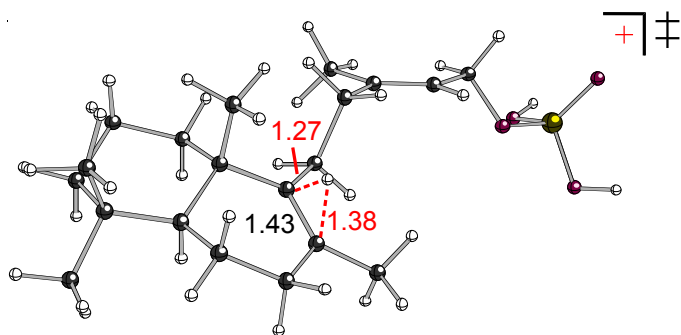

B3LYP/6-31+G(d,p)//B3LYP/6-31+G(d,p):

HF = -1425.9394739 hartrees (-894791.279266989 kcal/mol)

Imaginary Frequencies: 1 (-339.1941 1/cm)

Zero-point correction = 0.536331 (Hartree/Particle)

mPW1PW91/6-31+G(d,p)//B3LYP/6-31+G(d,p):

HF = -1425.6923079 hartrees (-894636.180130329 kcal/mol)

Coordinates (from last standard orientation):

| -----  |        |                         |           |           |  |
|--------|--------|-------------------------|-----------|-----------|--|
| Center | Atomic | Coordinates (Angstroms) |           |           |  |
| Number | Number | X                       | Y         | Z         |  |
| -----  |        |                         |           |           |  |
| 1      | 6      | 0.481613                | 2.895755  | -0.247092 |  |
| 2      | 6      | -1.811990               | -1.308666 | 0.525706  |  |
| 3      | 6      | 1.604644                | 0.602752  | 0.097723  |  |
| 4      | 6      | 1.683134                | 2.024299  | 0.035360  |  |
| 5      | 1      | -0.432952               | 2.554915  | 0.239548  |  |
| 6      | 6      | 0.274286                | -0.073969 | -0.227870 |  |
| 7      | 6      | -0.446922               | -0.791661 | 0.947313  |  |
| 8      | 6      | 2.903055                | -0.251723 | 0.310318  |  |
| 9      | 1      | -0.418983               | 0.649987  | -0.656287 |  |
| 10     | 1      | 1.442982                | 1.267887  | 1.166982  |  |
| 11     | 1      | 0.677174                | 3.925741  | 0.055511  |  |
| 12     | 1      | 0.483612                | -0.793293 | -1.022460 |  |
| 13     | 6      | 2.985500                | 2.764680  | 0.168756  |  |
| 14     | 1      | 2.864996                | 3.573968  | 0.899269  |  |
| 15     | 1      | 3.072288                | 3.279863  | -0.802211 |  |
| 16     | 6      | 4.231407                | 1.917760  | 0.433294  |  |
| 17     | 1      | 4.376859                | 1.790627  | 1.510152  |  |
| 18     | 1      | 5.100383                | 2.474367  | 0.076592  |  |
| 19     | 6      | 4.119893                | 0.559779  | -0.271825 |  |
| 20     | 1      | 3.826382                | 0.771295  | -1.314015 |  |
| 21     | 6      | 2.780472                | -1.586585 | -0.475932 |  |
| 22     | 1      | 1.981120                | -2.204537 | -0.054206 |  |
| 23     | 1      | 2.508866                | -1.370293 | -1.517846 |  |

|    |    |           |           |           |
|----|----|-----------|-----------|-----------|
| 24 | 6  | 5.486825  | -0.203186 | -0.417304 |
| 25 | 6  | 5.226001  | -1.561832 | -1.114638 |
| 26 | 1  | 4.976970  | -1.372972 | -2.168772 |
| 27 | 1  | 6.155253  | -2.143053 | -1.120625 |
| 28 | 6  | 4.094406  | -2.380016 | -0.489660 |
| 29 | 1  | 4.359990  | -2.706283 | 0.522198  |
| 30 | 1  | 3.938514  | -3.297662 | -1.067217 |
| 31 | 6  | 3.000988  | -0.560993 | 1.830436  |
| 32 | 1  | 3.157429  | 0.338631  | 2.433835  |
| 33 | 1  | 2.087774  | -1.043577 | 2.188059  |
| 34 | 1  | 3.824670  | -1.239171 | 2.043891  |
| 35 | 6  | 6.245634  | -0.413324 | 0.912454  |
| 36 | 1  | 5.767254  | -1.130576 | 1.582092  |
| 37 | 1  | 7.246966  | -0.800392 | 0.698120  |
| 38 | 1  | 6.378097  | 0.523541  | 1.463191  |
| 39 | 6  | 6.409208  | 0.619959  | -1.348339 |
| 40 | 1  | 7.293347  | 0.028842  | -1.607674 |
| 41 | 1  | 5.906236  | 0.885744  | -2.285387 |
| 42 | 1  | 6.770329  | 1.540547  | -0.879417 |
| 43 | 1  | -0.563456 | -0.088183 | 1.781031  |
| 44 | 1  | 0.167719  | -1.622295 | 1.311668  |
| 45 | 6  | -2.911158 | -0.654016 | 0.934738  |
| 46 | 6  | -4.338904 | -0.974989 | 0.621772  |
| 47 | 1  | -4.450975 | -1.824119 | -0.055605 |
| 48 | 1  | -2.791643 | 0.222320  | 1.571590  |
| 49 | 1  | -4.898706 | -1.180093 | 1.542182  |
| 50 | 1  | 0.298154  | 2.889227  | -1.329196 |
| 51 | 6  | -1.799971 | -2.550808 | -0.332079 |
| 52 | 1  | -2.787538 | -2.817778 | -0.709235 |
| 53 | 1  | -1.140912 | -2.433022 | -1.201014 |
| 54 | 1  | -1.419877 | -3.407106 | 0.239777  |
| 55 | 8  | -4.902970 | 0.207064  | -0.012436 |
| 56 | 8  | -6.612517 | 1.721270  | -0.955091 |
| 57 | 15 | -6.497637 | 0.310417  | -0.189108 |
| 58 | 8  | -7.338735 | 0.172600  | 1.023255  |
| 59 | 8  | -6.745073 | -0.799350 | -1.336622 |
| 60 | 1  | -7.143069 | 2.351180  | -0.444748 |
| 61 | 1  | -7.665062 | -1.102496 | -1.364799 |

---

**B**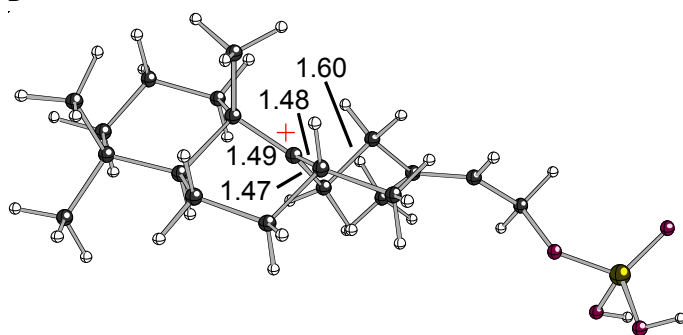

B3LYP/6-31+G(d,p)//B3LYP/6-31+G(d,p):  
 HF = -1425.9578709 hartrees (-894802.823568459 kcal/mol)  
 Imaginary Frequencies: none found  
 Zero-point correction = 0.539794 (Hartree/Particle)

mPW1PW91/6-31+G(d,p)//B3LYP/6-31+G(d,p):  
 HF = -1425.707782 hartrees (-894645.89028282 kcal/mol)

Coordinates (from last standard orientation):

| -----  |        |                         |           |           |
|--------|--------|-------------------------|-----------|-----------|
| Center | Atomic | Coordinates (Angstroms) |           |           |
| Number | Number | X                       | Y         | Z         |
| -----  |        |                         |           |           |
| 1      | 6      | -0.089406               | 2.546281  | -0.734782 |
| 2      | 6      | 1.657525                | -1.399354 | -0.314931 |
| 3      | 6      | -1.649051               | 0.486077  | -0.439182 |
| 4      | 6      | -1.494987               | 1.934292  | -0.698089 |
| 5      | 1      | 0.530050                | 2.099259  | -1.516386 |
| 6      | 6      | -0.556702               | -0.234659 | 0.232108  |
| 7      | 6      | 0.330690                | -0.948403 | -0.890681 |
| 8      | 6      | -2.971994               | -0.131707 | -0.729382 |
| 9      | 1      | 0.095950                | 0.450974  | 0.773971  |
| 10     | 1      | -2.030258               | 2.208502  | -1.609958 |
| 11     | 1      | -0.180873               | 3.612014  | -0.960795 |
| 12     | 1      | -0.919394               | -1.004979 | 0.913088  |
| 13     | 6      | -2.347264               | 2.555016  | 0.499971  |
| 14     | 1      | -2.323200               | 3.638737  | 0.346029  |
| 15     | 1      | -1.825861               | 2.349671  | 1.442349  |
| 16     | 6      | -3.771724               | 2.014285  | 0.531658  |
| 17     | 1      | -4.340158               | 2.404669  | -0.317618 |
| 18     | 1      | -4.264616               | 2.397863  | 1.430363  |
| 19     | 6      | -3.803617               | 0.479805  | 0.562669  |
| 20     | 1      | -3.224910               | 0.160254  | 1.441800  |
| 21     | 6      | -3.001387               | -1.681771 | -0.653807 |
| 22     | 1      | -2.527763               | -2.082922 | -1.556972 |
| 23     | 1      | -2.415859               | -2.039214 | 0.199085  |
| 24     | 6      | -5.224140               | -0.164883 | 0.774192  |

|    |    |           |           |           |
|----|----|-----------|-----------|-----------|
| 25 | 6  | -5.103176 | -1.707432 | 0.743257  |
| 26 | 1  | -4.540985 | -2.035571 | 1.629476  |
| 27 | 1  | -6.105911 | -2.137874 | 0.842798  |
| 28 | 6  | -4.415067 | -2.257266 | -0.506723 |
| 29 | 1  | -5.017211 | -2.059740 | -1.400202 |
| 30 | 1  | -4.337757 | -3.347468 | -0.436126 |
| 31 | 6  | -3.533531 | 0.322292  | -2.106769 |
| 32 | 1  | -4.347597 | -0.332165 | -2.413061 |
| 33 | 1  | -3.915706 | 1.342710  | -2.118409 |
| 34 | 6  | -6.286694 | 0.319053  | -0.235221 |
| 35 | 1  | -6.093950 | -0.002609 | -1.259505 |
| 36 | 1  | -7.261933 | -0.087419 | 0.051272  |
| 37 | 1  | -6.384601 | 1.408704  | -0.236003 |
| 38 | 6  | -5.703946 | 0.231488  | 2.193223  |
| 39 | 1  | -6.615582 | -0.324513 | 2.434980  |
| 40 | 1  | -4.958620 | -0.010494 | 2.959181  |
| 41 | 1  | -5.945963 | 1.295308  | 2.270292  |
| 42 | 1  | 0.502619  | -0.259432 | -1.720978 |
| 43 | 1  | -0.235369 | -1.800673 | -1.276942 |
| 44 | 6  | 2.780147  | -0.797997 | -0.745318 |
| 45 | 6  | 4.192340  | -1.100082 | -0.349864 |
| 46 | 1  | 4.269405  | -1.844500 | 0.445322  |
| 47 | 1  | 2.698183  | 0.005928  | -1.475699 |
| 48 | 1  | 4.762349  | -1.450053 | -1.219518 |
| 49 | 1  | 0.441517  | 2.460849  | 0.217055  |
| 50 | 6  | 1.589959  | -2.521027 | 0.691193  |
| 51 | 1  | 2.572086  | -2.814520 | 1.062137  |
| 52 | 1  | 0.986566  | -2.241951 | 1.564349  |
| 53 | 1  | 1.122190  | -3.409671 | 0.249293  |
| 54 | 8  | 4.767814  | 0.146699  | 0.121156  |
| 55 | 8  | 6.506432  | 1.763927  | 0.811261  |
| 56 | 15 | 6.370076  | 0.284127  | 0.197114  |
| 57 | 8  | 7.138291  | 0.031261  | -1.044495 |
| 58 | 8  | 6.693965  | -0.702766 | 1.432928  |
| 59 | 1  | 6.977124  | 2.353699  | 0.203450  |
| 60 | 1  | 7.621040  | -0.984540 | 1.450653  |
| 61 | 1  | -2.756001 | 0.242246  | -2.873417 |

---

**TS (B-C)**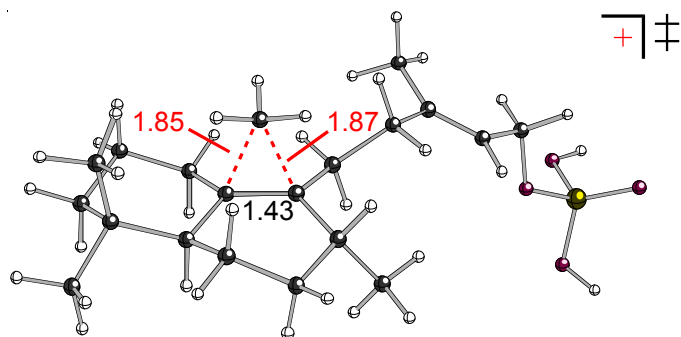

B3LYP/6-31+G(d,p)//B3LYP/6-31+G(d,p):

HF = -1425.9426356 hartrees (-894793.263265356 kcal/mol)

Imaginary Frequencies: 1 (-278.8232 1/cm)

Zero-point correction = 0.538573 (Hartree/Particle)

mPW1PW91/6-31+G(d,p)//B3LYP/6-31+G(d,p):

HF = -1425.6955364 hartrees (-894638.206046364 kcal/mol)

Coordinates (from last standard orientation):

| -----  |        |                         |           |           |  |
|--------|--------|-------------------------|-----------|-----------|--|
| Center | Atomic | Coordinates (Angstroms) |           |           |  |
| Number | Number | X                       | Y         | Z         |  |
| -----  |        |                         |           |           |  |
| 1      | 6      | -0.376799               | 2.410689  | -0.015408 |  |
| 2      | 6      | 1.913927                | -1.110631 | -1.173070 |  |
| 3      | 6      | -1.687601               | 0.246581  | -0.338775 |  |
| 4      | 6      | -1.546450               | 1.726528  | -0.764453 |  |
| 5      | 1      | 0.603214                | 1.998752  | -0.258064 |  |
| 6      | 6      | -0.368330               | -0.512929 | -0.211515 |  |
| 7      | 6      | 0.539121                | -0.531379 | -1.470223 |  |
| 8      | 6      | -2.899555               | -0.258211 | 0.218992  |  |
| 9      | 1      | 0.175083                | -0.025931 | 0.606847  |  |
| 10     | 1      | -1.287731               | 1.725904  | -1.830560 |  |
| 11     | 1      | -0.367379               | 3.468249  | -0.293980 |  |
| 12     | 1      | -0.538338               | -1.536870 | 0.115707  |  |
| 13     | 6      | -2.814696               | 2.583649  | -0.555768 |  |
| 14     | 1      | -2.805903               | 3.402501  | -1.281829 |  |
| 15     | 1      | -2.758152               | 3.054198  | 0.433935  |  |
| 16     | 6      | -4.121015               | 1.803011  | -0.636152 |  |
| 17     | 1      | -4.281668               | 1.418726  | -1.650109 |  |
| 18     | 1      | -4.956364               | 2.476732  | -0.434714 |  |
| 19     | 6      | -4.123822               | 0.660761  | 0.391085  |  |
| 20     | 1      | -3.911990               | 1.117429  | 1.373517  |  |
| 21     | 6      | -2.913852               | -1.512600 | 1.081857  |  |
| 22     | 1      | -2.139513               | -2.221310 | 0.789482  |  |
| 23     | 1      | -2.632550               | -1.155104 | 2.084653  |  |

|    |    |           |           |           |
|----|----|-----------|-----------|-----------|
| 24 | 6  | -5.522052 | -0.044128 | 0.580701  |
| 25 | 6  | -5.374269 | -1.229799 | 1.562783  |
| 26 | 1  | -5.156977 | -0.839295 | 2.567092  |
| 27 | 1  | -6.335717 | -1.749652 | 1.638848  |
| 28 | 6  | -4.274314 | -2.213163 | 1.166471  |
| 29 | 1  | -4.507937 | -2.699339 | 0.211434  |
| 30 | 1  | -4.200254 | -3.018453 | 1.904146  |
| 31 | 6  | -2.679438 | -0.773449 | -1.547023 |
| 32 | 1  | -3.757890 | -0.761087 | -1.690537 |
| 33 | 1  | -2.250857 | -0.190078 | -2.360696 |
| 34 | 6  | -6.156562 | -0.530246 | -0.742175 |
| 35 | 1  | -5.610035 | -1.350386 | -1.219133 |
| 36 | 1  | -7.162581 | -0.911504 | -0.540184 |
| 37 | 1  | -6.263430 | 0.279313  | -1.469824 |
| 38 | 6  | -6.492614 | 0.974815  | 1.220867  |
| 39 | 1  | -7.428841 | 0.474729  | 1.487948  |
| 40 | 1  | -6.076387 | 1.406202  | 2.138350  |
| 41 | 1  | -6.749232 | 1.794363  | 0.543832  |
| 42 | 1  | 0.655923  | 0.477342  | -1.873459 |
| 43 | 1  | 0.054991  | -1.131520 | -2.252587 |
| 44 | 6  | 2.973690  | -0.285815 | -1.142684 |
| 45 | 6  | 4.402642  | -0.634912 | -0.867271 |
| 46 | 1  | 4.554146  | -1.691206 | -0.636214 |
| 47 | 1  | 2.817067  | 0.774349  | -1.339300 |
| 48 | 1  | 5.032809  | -0.366278 | -1.723694 |
| 49 | 1  | -0.515594 | 2.361160  | 1.069866  |
| 50 | 6  | 1.964490  | -2.603999 | -0.955421 |
| 51 | 1  | 2.955091  | -2.960426 | -0.672043 |
| 52 | 1  | 1.270201  | -2.921412 | -0.167551 |
| 53 | 1  | 1.670979  | -3.134365 | -1.870747 |
| 54 | 8  | 4.815799  | 0.154753  | 0.283035  |
| 55 | 8  | 6.332280  | 1.215539  | 1.925138  |
| 56 | 15 | 6.385403  | 0.349747  | 0.569905  |
| 57 | 8  | 7.218975  | 0.916277  | -0.517015 |
| 58 | 8  | 6.790790  | -1.136964 | 1.054512  |
| 59 | 1  | 6.743956  | 2.083658  | 1.800614  |
| 60 | 1  | 7.744034  | -1.298809 | 0.990248  |
| 61 | 1  | -2.280980 | -1.782285 | -1.522134 |

---



C

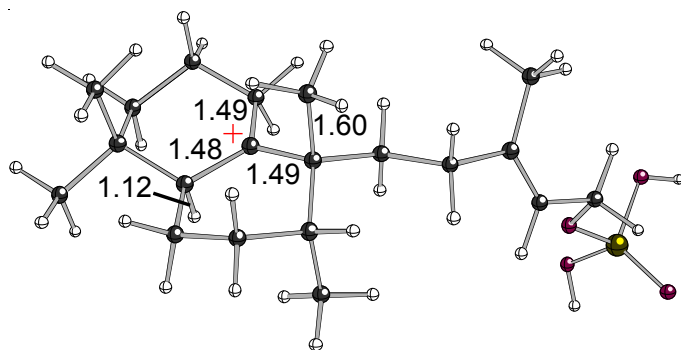

B3LYP/6-31+G(d,p)//B3LYP/6-31+G(d,p):  
 HF = -1425.9550974 hartrees (-894801.083169474 kcal/mol)  
 Imaginary Frequencies: none found  
 Zero-point correction = 0.538127 (Hartree/Particle)

mPW1PW91/6-31+G(d,p)//B3LYP/6-31+G(d,p):  
 HF = -1425.7061913 hartrees (-894644.892102663 kcal/mol)

Coordinates (from last standard orientation):

| -----  |        |                         |           |           |  |
|--------|--------|-------------------------|-----------|-----------|--|
| Center | Atomic | Coordinates (Angstroms) |           |           |  |
| Number | Number | X                       | Y         | Z         |  |
| -----  |        |                         |           |           |  |
| 1      | 6      | -1.256150               | -1.116349 | -2.330251 |  |
| 2      | 6      | 1.990860                | -1.566494 | 1.023750  |  |
| 3      | 6      | -1.828224               | -0.979669 | 0.191878  |  |
| 4      | 6      | -1.974989               | -1.779965 | -1.139799 |  |
| 5      | 1      | -0.175073               | -1.061751 | -2.185689 |  |
| 6      | 6      | -0.331235               | -0.693931 | 0.541451  |  |
| 7      | 6      | 0.591234                | -1.935093 | 0.553060  |  |
| 8      | 6      | -2.709856               | 0.215563  | 0.260247  |  |
| 9      | 1      | 0.071384                | 0.028314  | -0.176692 |  |
| 10     | 1      | -1.497014               | -2.749503 | -0.964096 |  |
| 11     | 1      | -1.432296               | -1.701380 | -3.237922 |  |
| 12     | 1      | -0.263756               | -0.218927 | 1.522892  |  |
| 13     | 6      | -3.453860               | -2.039567 | -1.448795 |  |
| 14     | 1      | -3.902011               | -2.643400 | -0.653072 |  |
| 15     | 1      | -3.538307               | -2.639377 | -2.360286 |  |
| 16     | 6      | -4.239707               | -0.736176 | -1.627904 |  |
| 17     | 1      | -5.303424               | -0.944895 | -1.502806 |  |
| 18     | 1      | -4.132730               | -0.377007 | -2.655496 |  |
| 19     | 6      | -3.842031               | 0.425047  | -0.674063 |  |
| 20     | 1      | -3.292598               | 1.172636  | -1.299232 |  |
| 21     | 6      | -2.393729               | 1.293973  | 1.237261  |  |
| 22     | 1      | -1.788590               | 0.905871  | 2.058211  |  |
| 23     | 1      | -1.688117               | 1.930351  | 0.666245  |  |

|    |    |           |           |           |
|----|----|-----------|-----------|-----------|
| 24 | 6  | -5.068974 | 1.262063  | -0.117415 |
| 25 | 6  | -4.537984 | 2.502027  | 0.633114  |
| 26 | 1  | -4.051960 | 3.177295  | -0.085163 |
| 27 | 1  | -5.388201 | 3.056634  | 1.044731  |
| 28 | 6  | -3.559545 | 2.153704  | 1.750066  |
| 29 | 1  | -4.067263 | 1.618523  | 2.559336  |
| 30 | 1  | -3.146090 | 3.061394  | 2.199196  |
| 31 | 6  | -2.481248 | -1.801235 | 1.398591  |
| 32 | 1  | -3.573285 | -1.795287 | 1.410855  |
| 33 | 1  | -2.163980 | -2.839324 | 1.269023  |
| 34 | 6  | -5.931511 | 0.387869  | 0.817366  |
| 35 | 1  | -5.375515 | 0.022286  | 1.686852  |
| 36 | 1  | -6.776256 | 0.974661  | 1.191815  |
| 37 | 1  | -6.349358 | -0.480272 | 0.300527  |
| 38 | 6  | -5.926774 | 1.751277  | -1.301753 |
| 39 | 1  | -6.732948 | 2.389449  | -0.926827 |
| 40 | 1  | -5.336698 | 2.346141  | -2.008240 |
| 41 | 1  | -6.393976 | 0.931733  | -1.853108 |
| 42 | 1  | 0.650211  | -2.370772 | -0.447679 |
| 43 | 1  | 0.177402  | -2.706354 | 1.214810  |
| 44 | 6  | 2.943261  | -1.318427 | 0.109549  |
| 45 | 6  | 4.365345  | -0.925022 | 0.355737  |
| 46 | 1  | 4.611437  | -0.841125 | 1.416190  |
| 47 | 1  | 2.687693  | -1.404412 | -0.946378 |
| 48 | 1  | 5.048971  | -1.644371 | -0.110440 |
| 49 | 1  | -1.610454 | -0.098488 | -2.529402 |
| 50 | 6  | 2.182913  | -1.521596 | 2.520347  |
| 51 | 1  | 3.127968  | -1.066763 | 2.820081  |
| 52 | 1  | 1.378371  | -0.957625 | 3.008457  |
| 53 | 1  | 2.153250  | -2.535903 | 2.939069  |
| 54 | 8  | 4.561679  | 0.375949  | -0.271002 |
| 55 | 8  | 5.746452  | 2.360896  | -1.139153 |
| 56 | 15 | 6.056383  | 0.910522  | -0.511872 |
| 57 | 8  | 6.982529  | 0.063498  | -1.300730 |
| 58 | 8  | 6.521842  | 1.211430  | 1.006711  |
| 59 | 1  | 6.132402  | 2.442600  | -2.023988 |
| 60 | 1  | 7.486469  | 1.230283  | 1.096447  |
| 61 | 1  | -2.118202 | -1.431251 | 2.358632  |

---

### TS (C-D)

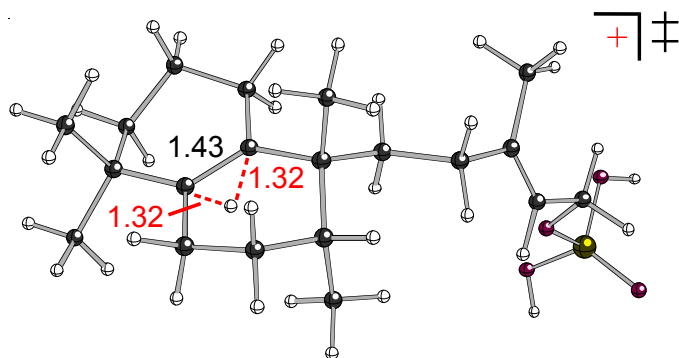

B3LYP/6-31+G(d,p)//B3LYP/6-31+G(d,p):

HF = -1425.9497501 hartrees (-894797.727685251 kcal/mol)

Imaginary Frequencies: 1 (-363.0034 1/cm)

Zero-point correction = 0.536672 (Hartree/Particle)

mPW1PW91/6-31+G(d,p)//B3LYP/6-31+G(d,p):

HF = -1425.7033613 hartrees (-894643.116249363 kcal/mol)

Coordinates (from last standard orientation):

| Center Number | Atomic Number | Coordinates (Angstroms) |           |           |
|---------------|---------------|-------------------------|-----------|-----------|
|               |               | X                       | Y         | Z         |
| 1             | 6             | -1.231049               | -0.731509 | -2.373138 |
| 2             | 6             | 1.979780                | -1.799415 | 0.763743  |
| 3             | 6             | -1.882834               | -1.242169 | 0.106375  |
| 4             | 6             | -1.998344               | -1.648307 | -1.399462 |
| 5             | 1             | -0.153472               | -0.752995 | -2.202323 |
| 6             | 6             | -0.399715               | -0.973192 | 0.509606  |
| 7             | 6             | 0.580646                | -2.146102 | 0.275431  |
| 8             | 6             | -2.760078               | -0.009779 | 0.426224  |
| 9             | 1             | -0.021859               | -0.098036 | -0.031172 |
| 10            | 1             | -1.553588               | -2.645743 | -1.479063 |
| 11            | 1             | -1.403935               | -1.061578 | -3.402114 |
| 12            | 1             | -0.361204               | -0.715464 | 1.571176  |
| 13            | 6             | -3.475335               | -1.764570 | -1.804347 |
| 14            | 1             | -3.977722               | -2.527120 | -1.202274 |
| 15            | 1             | -3.554478               | -2.096005 | -2.844156 |
| 16            | 6             | -4.199100               | -0.423312 | -1.654348 |
| 17            | 1             | -5.283074               | -0.569226 | -1.653345 |
| 18            | 1             | -4.003909               | 0.223083  | -2.517745 |
| 19            | 6             | -3.861048               | 0.362416  | -0.398191 |
| 20            | 1             | -2.652378               | 0.862121  | -0.563523 |
| 21            | 6             | -2.471981               | 0.732886  | 1.723880  |
| 22            | 1             | -2.249844               | -0.027724 | 2.477820  |

|    |    |           |           |           |
|----|----|-----------|-----------|-----------|
| 23 | 1  | -1.534813 | 1.287535  | 1.593546  |
| 24 | 6  | -4.812468 | 1.517615  | -0.025042 |
| 25 | 6  | -4.178411 | 2.441892  | 1.039333  |
| 26 | 1  | -3.396186 | 3.053676  | 0.566806  |
| 27 | 1  | -4.943808 | 3.142761  | 1.386333  |
| 28 | 6  | -3.583058 | 1.666117  | 2.210929  |
| 29 | 1  | -4.360498 | 1.088073  | 2.721441  |
| 30 | 1  | -3.170985 | 2.352159  | 2.956460  |
| 31 | 6  | -2.465556 | -2.375539 | 1.009839  |
| 32 | 1  | -3.555697 | -2.439095 | 0.962945  |
| 33 | 1  | -2.067432 | -3.339737 | 0.684091  |
| 34 | 6  | -6.111761 | 0.870175  | 0.533254  |
| 35 | 1  | -5.924367 | 0.216364  | 1.389209  |
| 36 | 1  | -6.782483 | 1.669533  | 0.861865  |
| 37 | 1  | -6.643579 | 0.291740  | -0.225987 |
| 38 | 6  | -5.166234 | 2.366507  | -1.267601 |
| 39 | 1  | -5.798019 | 3.202916  | -0.955562 |
| 40 | 1  | -4.271704 | 2.789469  | -1.738523 |
| 41 | 1  | -5.722204 | 1.803949  | -2.021108 |
| 42 | 1  | 0.623087  | -2.400423 | -0.787548 |
| 43 | 1  | 0.224759  | -3.039649 | 0.802849  |
| 44 | 6  | 2.901521  | -1.389444 | -0.123362 |
| 45 | 6  | 4.312738  | -0.977462 | 0.151646  |
| 46 | 1  | 4.588503  | -1.064095 | 1.204453  |
| 47 | 1  | 2.623138  | -1.334191 | -1.175555 |
| 48 | 1  | 5.012730  | -1.571344 | -0.447374 |
| 49 | 1  | -1.540109 | 0.321257  | -2.324342 |
| 50 | 6  | 2.208060  | -1.957980 | 2.247756  |
| 51 | 1  | 3.155037  | -1.535326 | 2.585636  |
| 52 | 1  | 1.410041  | -1.477213 | 2.826733  |
| 53 | 1  | 2.198447  | -3.020475 | 2.523481  |
| 54 | 8  | 4.435547  | 0.421180  | -0.246550 |
| 55 | 8  | 5.507611  | 2.586059  | -0.760165 |
| 56 | 15 | 5.897203  | 1.068350  | -0.386243 |
| 57 | 8  | 6.865852  | 0.420100  | -1.302479 |
| 58 | 8  | 6.353489  | 1.133701  | 1.163688  |
| 59 | 1  | 5.885554  | 2.836785  | -1.616187 |
| 60 | 1  | 7.316276  | 1.186903  | 1.258646  |
| 61 | 1  | -2.182902 | -2.239414 | 2.056939  |

---

D

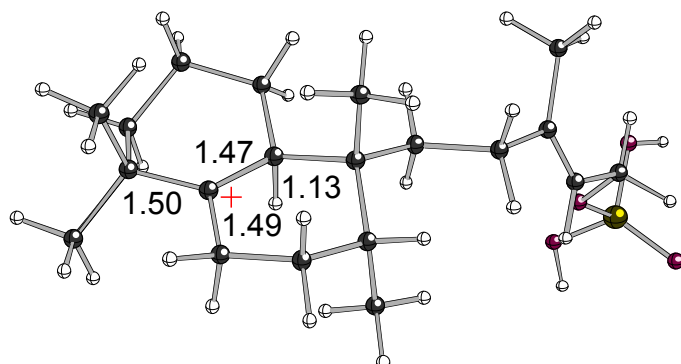

B3LYP/6-31+G(d,p)//B3LYP/6-31+G(d,p):  
HF = -1425.9541985 hartrees (-894800.519100735 kcal/mol)  
Imaginary Frequencies: none found  
Zero-point correction = 0.538146 (Hartree/Particle)

mPW1PW91/6-31+G(d,p)//B3LYP/6-31+G(d,p):  
HF = -1425.7053813 hartrees (-894644.383819563 kcal/mol)

Coordinates (from last standard orientation):

| Center Number | Atomic Number | Coordinates (Angstroms) |           |           |
|---------------|---------------|-------------------------|-----------|-----------|
|               |               | X                       | Y         | Z         |
| 1             | 6             | -1.222892               | -0.961950 | -2.364948 |
| 2             | 6             | 1.991201                | -1.656227 | 0.945329  |
| 3             | 6             | -1.850731               | -1.101050 | 0.172090  |
| 4             | 6             | -1.967892               | -1.726671 | -1.253949 |
| 5             | 1             | -0.146144               | -0.924113 | -2.189734 |
| 6             | 6             | -0.365110               | -0.816785 | 0.539825  |
| 7             | 6             | 0.593138                | -2.028762 | 0.475434  |
| 8             | 6             | -2.646957               | 0.267768  | 0.223023  |
| 9             | 1             | 0.035095                | -0.030861 | -0.111844 |
| 10            | 1             | -1.512531               | -2.721545 | -1.192453 |
| 11            | 1             | -1.377198               | -1.459481 | -3.327518 |
| 12            | 1             | -0.328560               | -0.411551 | 1.555229  |
| 13            | 6             | -3.443654               | -1.932789 | -1.622130 |
| 14            | 1             | -3.915482               | -2.656118 | -0.951068 |
| 15            | 1             | -3.529594               | -2.351512 | -2.629542 |
| 16            | 6             | -4.228694               | -0.616816 | -1.576941 |
| 17            | 1             | -5.307279               | -0.768951 | -1.681393 |
| 18            | 1             | -3.972825               | 0.000185  | -2.460879 |
| 19            | 6             | -3.955247               | 0.305655  | -0.447327 |
| 20            | 1             | -2.181764               | 0.898559  | -0.587807 |
| 21            | 6             | -2.457462               | 1.079655  | 1.538408  |
| 22            | 1             | -2.304130               | 0.370939  | 2.354793  |

|    |    |           |           |           |
|----|----|-----------|-----------|-----------|
| 23 | 1  | -1.520048 | 1.633607  | 1.444520  |
| 24 | 6  | -4.970767 | 1.353606  | -0.125585 |
| 25 | 6  | -4.365357 | 2.519043  | 0.687235  |
| 26 | 1  | -3.707869 | 3.102433  | 0.028348  |
| 27 | 1  | -5.180033 | 3.189464  | 0.979045  |
| 28 | 6  | -3.595939 | 2.043556  | 1.915129  |
| 29 | 1  | -4.284761 | 1.558882  | 2.614716  |
| 30 | 1  | -3.182446 | 2.902421  | 2.451113  |
| 31 | 6  | -2.469451 | -2.063775 | 1.219124  |
| 32 | 1  | -3.562379 | -2.100650 | 1.166784  |
| 33 | 1  | -2.105140 | -3.082848 | 1.063004  |
| 34 | 6  | -6.023599 | 0.557979  | 0.745836  |
| 35 | 1  | -5.582258 | 0.028847  | 1.592955  |
| 36 | 1  | -6.723437 | 1.301279  | 1.139577  |
| 37 | 1  | -6.582432 | -0.156847 | 0.138706  |
| 38 | 6  | -5.696497 | 1.919107  | -1.370735 |
| 39 | 1  | -6.423985 | 2.663424  | -1.036075 |
| 40 | 1  | -4.993125 | 2.422404  | -2.041980 |
| 41 | 1  | -6.242133 | 1.163364  | -1.938481 |
| 42 | 1  | 0.648829  | -2.412716 | -0.547836 |
| 43 | 1  | 0.206819  | -2.843774 | 1.100217  |
| 44 | 6  | 2.936132  | -1.367994 | 0.034883  |
| 45 | 6  | 4.351101  | -0.955898 | 0.288453  |
| 46 | 1  | 4.607385  | -0.928654 | 1.349307  |
| 47 | 1  | 2.676394  | -1.427933 | -1.021843 |
| 48 | 1  | 5.047718  | -1.626965 | -0.227246 |
| 49 | 1  | -1.562414 | 0.075595  | -2.484669 |
| 50 | 6  | 2.191879  | -1.648630 | 2.441596  |
| 51 | 1  | 3.137146  | -1.198987 | 2.748462  |
| 52 | 1  | 1.387724  | -1.099542 | 2.946241  |
| 53 | 1  | 2.166016  | -2.673585 | 2.833890  |
| 54 | 8  | 4.512739  | 0.387465  | -0.260420 |
| 55 | 8  | 5.641854  | 2.455041  | -1.004024 |
| 56 | 15 | 5.990046  | 0.973659  | -0.474347 |
| 57 | 8  | 6.933529  | 0.206654  | -1.323067 |
| 58 | 8  | 6.462374  | 1.188848  | 1.057166  |
| 59 | 1  | 6.014198  | 2.599426  | -1.886560 |
| 60 | 1  | 7.427137  | 1.223394  | 1.139406  |
| 61 | 1  | -2.200372 | -1.780674 | 2.240103  |

---

### TS (D-E)

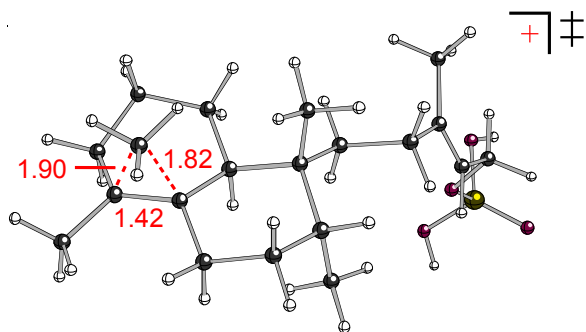

B3LYP/6-31+G(d,p)//B3LYP/6-31+G(d,p):

HF = -1425.9365051 hartrees (-894789.416315301 kcal/mol)

Imaginary Frequencies: 1 (-299.4242 1/cm)

Zero-point correction = 0.538782 (Hartree/Particle)

mPW1PW91/6-31+G(d,p)//B3LYP/6-31+G(d,p):

HF = -1425.6895007 hartrees (-894634.418584257 kcal/mol)

Coordinates (from last standard orientation):

| -----  |        |                         |           |           |  |
|--------|--------|-------------------------|-----------|-----------|--|
| Center | Atomic | Coordinates (Angstroms) |           |           |  |
| Number | Number | X                       | Y         | Z         |  |
| -----  |        |                         |           |           |  |
| 1      | 6      | -1.087857               | -0.845879 | -2.369747 |  |
| 2      | 6      | 1.947193                | -1.691964 | 0.931184  |  |
| 3      | 6      | -1.890520               | -1.074644 | 0.120215  |  |
| 4      | 6      | -1.967724               | -1.603224 | -1.354305 |  |
| 5      | 1      | -0.025012               | -0.932959 | -2.137944 |  |
| 6      | 6      | -0.409747               | -0.848910 | 0.557682  |  |
| 7      | 6      | 0.547613                | -2.059953 | 0.461432  |  |
| 8      | 6      | -2.611424               | 0.331110  | 0.218357  |  |
| 9      | 1      | 0.020047                | -0.031533 | -0.033244 |  |
| 10     | 1      | -1.603299               | -2.637106 | -1.332575 |  |
| 11     | 1      | -1.234264               | -1.264986 | -3.370597 |  |
| 12     | 1      | -0.403703               | -0.502799 | 1.595779  |  |
| 13     | 6      | -3.429645               | -1.656505 | -1.838272 |  |
| 14     | 1      | -4.009106               | -2.373986 | -1.247347 |  |
| 15     | 1      | -3.463901               | -2.022800 | -2.869660 |  |
| 16     | 6      | -4.105553               | -0.282640 | -1.794431 |  |
| 17     | 1      | -5.142527               | -0.359672 | -2.125609 |  |
| 18     | 1      | -3.612567               | 0.391013  | -2.508861 |  |
| 19     | 6      | -3.999910               | 0.420627  | -0.444176 |  |
| 20     | 1      | -2.045753               | 0.977161  | -0.472243 |  |
| 21     | 6      | -2.485578               | 0.997540  | 1.623720  |  |
| 22     | 1      | -2.337449               | 0.230554  | 2.386894  |  |
| 23     | 1      | -1.567756               | 1.590807  | 1.621221  |  |

|    |    |           |           |           |
|----|----|-----------|-----------|-----------|
| 24 | 6  | -4.829724 | 1.533580  | -0.159944 |
| 25 | 6  | -4.413622 | 2.521001  | 0.904587  |
| 26 | 1  | -3.770661 | 3.241977  | 0.374581  |
| 27 | 1  | -5.283157 | 3.088494  | 1.250991  |
| 28 | 6  | -3.656595 | 1.893283  | 2.073090  |
| 29 | 1  | -4.365503 | 1.321667  | 2.682378  |
| 30 | 1  | -3.285112 | 2.687565  | 2.725953  |
| 31 | 6  | -2.529874 | -2.122605 | 1.063299  |
| 32 | 1  | -3.576509 | -2.336054 | 0.832760  |
| 33 | 1  | -2.002399 | -3.075828 | 0.976480  |
| 34 | 6  | -5.387140 | -0.112382 | 0.608838  |
| 35 | 1  | -4.795805 | -0.707729 | 1.298294  |
| 36 | 1  | -6.029093 | 0.532210  | 1.214766  |
| 37 | 1  | -5.997583 | -0.700827 | -0.068885 |
| 38 | 6  | -5.930577 | 2.002718  | -1.077308 |
| 39 | 1  | -6.739441 | 2.469379  | -0.510055 |
| 40 | 1  | -5.498909 | 2.777743  | -1.724292 |
| 41 | 1  | -6.344917 | 1.230601  | -1.723795 |
| 42 | 1  | 0.597078  | -2.425699 | -0.568586 |
| 43 | 1  | 0.170308  | -2.888025 | 1.073984  |
| 44 | 6  | 2.892207  | -1.397463 | 0.022617  |
| 45 | 6  | 4.305020  | -0.979986 | 0.278496  |
| 46 | 1  | 4.559861  | -0.953734 | 1.339778  |
| 47 | 1  | 2.632795  | -1.452773 | -1.034317 |
| 48 | 1  | 5.007237  | -1.643878 | -0.238532 |
| 49 | 1  | -1.313688 | 0.224403  | -2.431706 |
| 50 | 6  | 2.149907  | -1.690282 | 2.427502  |
| 51 | 1  | 3.099144  | -1.249324 | 2.734954  |
| 52 | 1  | 1.350726  | -1.136282 | 2.934422  |
| 53 | 1  | 2.116165  | -2.716203 | 2.816681  |
| 54 | 8  | 4.460704  | 0.366802  | -0.267321 |
| 55 | 8  | 5.580814  | 2.438486  | -1.025838 |
| 56 | 15 | 5.932564  | 0.974643  | -0.449787 |
| 57 | 8  | 6.914979  | 0.203463  | -1.249307 |
| 58 | 8  | 6.353049  | 1.240738  | 1.088803  |
| 59 | 1  | 5.947586  | 2.552753  | -1.915073 |
| 60 | 1  | 7.313609  | 1.305788  | 1.197226  |
| 61 | 1  | -2.469971 | -1.826006 | 2.115263  |

---



E

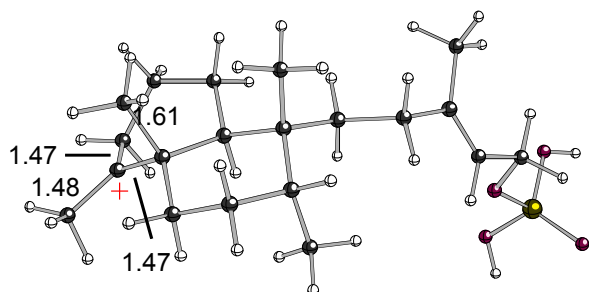

B3LYP/6-31+G(d,p)//B3LYP/6-31+G(d,p):  
HF = -1425.9414643 hartrees (-894792.528262893 kcal/mol)  
Imaginary Frequencies: none found  
Zero-point correction = 0.538332 (Hartree/Particle)

mPW1PW91/6-31+G(d,p)//B3LYP/6-31+G(d,p):  
HF = -1425.6926086 hartrees (-894636.368822586 kcal/mol)

Coordinates (from last standard orientation):

| Center Number | Atomic Number | Coordinates (Angstroms) |           |           |
|---------------|---------------|-------------------------|-----------|-----------|
|               |               | X                       | Y         | Z         |
| 1             | 6             | -1.191107               | -0.526343 | -2.373431 |
| 2             | 6             | 1.923970                | -1.819086 | 0.684212  |
| 3             | 6             | -1.940095               | -1.124874 | 0.071476  |
| 4             | 6             | -2.035859               | -1.440384 | -1.461580 |
| 5             | 1             | -0.121222               | -0.634983 | -2.186832 |
| 6             | 6             | -0.450612               | -0.943441 | 0.505287  |
| 7             | 6             | 0.511542                | -2.118326 | 0.205524  |
| 8             | 6             | -2.681011               | 0.239633  | 0.367128  |
| 9             | 1             | -0.038498               | -0.041124 | 0.038124  |
| 10            | 1             | -1.652033               | -2.458767 | -1.595531 |
| 11            | 1             | -1.362768               | -0.788949 | -3.422633 |
| 12            | 1             | -0.424055               | -0.765719 | 1.585081  |
| 13            | 6             | -3.504927               | -1.459457 | -1.924282 |
| 14            | 1             | -4.058176               | -2.253955 | -1.411812 |
| 15            | 1             | -3.554434               | -1.706564 | -2.990590 |
| 16            | 6             | -4.200836               | -0.109535 | -1.718627 |
| 17            | 1             | -5.244303               | -0.187190 | -2.041318 |
| 18            | 1             | -3.727082               | 0.639025  | -2.364087 |
| 19            | 6             | -4.127734               | 0.381315  | -0.244230 |
| 20            | 1             | -2.100226               | 0.989199  | -0.189283 |
| 21            | 6             | -2.622294               | 0.666469  | 1.857668  |
| 22            | 1             | -2.845890               | -0.183508 | 2.507230  |
| 23            | 1             | -1.594237               | 0.955270  | 2.081989  |
| 24            | 6             | -4.621599               | 1.759398  | -0.080103 |
| 25            | 6             | -4.089669               | 2.598768  | 1.005407  |

|    |    |           |           |           |
|----|----|-----------|-----------|-----------|
| 26 | 1  | -3.235377 | 3.094930  | 0.492492  |
| 27 | 1  | -4.775606 | 3.410811  | 1.263970  |
| 28 | 6  | -3.560540 | 1.838865  | 2.230940  |
| 29 | 1  | -4.426740 | 1.485158  | 2.798615  |
| 30 | 1  | -3.048662 | 2.553653  | 2.879667  |
| 31 | 6  | -2.525119 | -2.310424 | 0.878394  |
| 32 | 1  | -3.596181 | -2.457174 | 0.737643  |
| 33 | 1  | -2.041743 | -3.242743 | 0.574940  |
| 34 | 6  | -5.274940 | -0.359660 | 0.599626  |
| 35 | 1  | -5.069631 | -0.356518 | 1.667644  |
| 36 | 1  | -6.271162 | 0.058595  | 0.427983  |
| 37 | 1  | -5.297917 | -1.389051 | 0.240473  |
| 38 | 6  | -5.595216 | 2.363011  | -1.014254 |
| 39 | 1  | -6.162819 | 3.179867  | -0.565663 |
| 40 | 1  | -4.993719 | 2.793964  | -1.835143 |
| 41 | 1  | -6.256168 | 1.636066  | -1.488703 |
| 42 | 1  | 0.534972  | -2.328339 | -0.867652 |
| 43 | 1  | 0.152551  | -3.029857 | 0.698625  |
| 44 | 6  | 2.843982  | -1.397379 | -0.200015 |
| 45 | 6  | 4.267533  | -1.030372 | 0.070824  |
| 46 | 1  | 4.567009  | -1.199563 | 1.106825  |
| 47 | 1  | 2.551555  | -1.295595 | -1.244778 |
| 48 | 1  | 4.942786  | -1.587202 | -0.588746 |
| 49 | 1  | -1.426419 | 0.537869  | -2.264354 |
| 50 | 6  | 2.170051  | -2.034958 | 2.158005  |
| 51 | 1  | 3.137715  | -1.660954 | 2.495015  |
| 52 | 1  | 1.398720  | -1.543068 | 2.762629  |
| 53 | 1  | 2.121278  | -3.104891 | 2.398825  |
| 54 | 8  | 4.412286  | 0.395292  | -0.222497 |
| 55 | 8  | 5.511635  | 2.577874  | -0.567615 |
| 56 | 15 | 5.880339  | 1.022740  | -0.355234 |
| 57 | 8  | 6.805214  | 0.455100  | -1.366198 |
| 58 | 8  | 6.400597  | 0.929168  | 1.174000  |
| 59 | 1  | 5.882322  | 2.903254  | -1.401276 |
| 60 | 1  | 7.367906  | 0.935364  | 1.227748  |
| 61 | 1  | -2.347817 | -2.197196 | 1.952084  |

---

D'

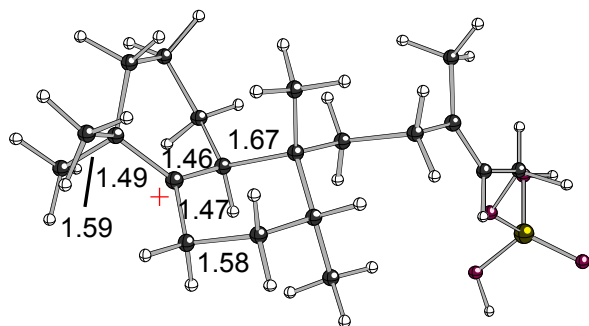

B3LYP/6-31+G(d,p)//B3LYP/6-31+G(d,p):  
HF = -1425.9525172 hartrees (-894799.464068172 kcal/mol)  
Imaginary Frequencies: none found  
Zero-point correction = 0.539414 (Hartree/Particle)

mPW1PW91/6-31+G(d,p)//B3LYP/6-31+G(d,p):  
HF = -1425.7025211 hartrees (-894642.589015461 kcal/mol)

Coordinates (from last standard orientation):

| Center Number | Atomic Number | Coordinates (Angstroms) |           |           |
|---------------|---------------|-------------------------|-----------|-----------|
|               |               | X                       | Y         | Z         |
| 1             | 6             | -0.922807               | 2.584811  | -0.060701 |
| 2             | 6             | 1.872734                | -0.650375 | -1.680588 |
| 3             | 6             | -1.863528               | 0.232885  | -0.752890 |
| 4             | 6             | -1.887557               | 1.782209  | -0.953738 |
| 5             | 1             | 0.118597                | 2.297880  | -0.214263 |
| 6             | 6             | -0.424204               | -0.330282 | -0.657533 |
| 7             | 6             | 0.487292                | -0.058554 | -1.884628 |
| 8             | 6             | -2.580164               | -0.071479 | 0.725134  |
| 9             | 1             | 0.072868                | 0.064692  | 0.234532  |
| 10            | 1             | -1.567187               | 1.943733  | -1.992247 |
| 11            | 1             | -1.001925               | 3.650192  | -0.296896 |
| 12            | 1             | -0.482629               | -1.413818 | -0.523128 |
| 13            | 6             | -3.315171               | 2.339437  | -0.863370 |
| 14            | 1             | -3.941836               | 1.976393  | -1.681819 |
| 15            | 1             | -3.314158               | 3.431255  | -0.928330 |
| 16            | 6             | -3.997728               | 1.967996  | 0.508451  |
| 17            | 1             | -5.014035               | 2.356643  | 0.538275  |
| 18            | 1             | -3.409494               | 2.448305  | 1.299448  |
| 19            | 6             | -3.924423               | 0.503996  | 0.664055  |
| 20            | 1             | -1.968510               | 0.571308  | 1.369798  |
| 21            | 6             | -2.522858               | -1.506051 | 1.280319  |
| 22            | 1             | -1.526129               | -1.923594 | 1.130331  |
| 23            | 1             | -2.624119               | -1.410689 | 2.367145  |
| 24            | 6             | -5.142797               | -0.343615 | 0.741701  |

|    |    |           |           |           |
|----|----|-----------|-----------|-----------|
| 25 | 6  | -4.897431 | -1.801164 | 0.270788  |
| 26 | 1  | -5.768063 | -2.389734 | 0.575730  |
| 27 | 1  | -4.918294 | -1.788005 | -0.822852 |
| 28 | 6  | -3.598294 | -2.482385 | 0.757789  |
| 29 | 1  | -3.193701 | -3.080289 | -0.064103 |
| 30 | 1  | -3.824525 | -3.195731 | 1.555441  |
| 31 | 6  | -2.621578 | -0.474424 | -1.894233 |
| 32 | 1  | -3.670609 | -0.177664 | -1.970114 |
| 33 | 1  | -2.154424 | -0.235182 | -2.853320 |
| 34 | 6  | -6.373398 | 0.226987  | 0.001214  |
| 35 | 1  | -6.169424 | 0.379735  | -1.062929 |
| 36 | 1  | -7.190310 | -0.495693 | 0.078152  |
| 37 | 1  | -6.733211 | 1.166215  | 0.426792  |
| 38 | 6  | -5.450941 | -0.308847 | 2.297231  |
| 39 | 1  | -6.353063 | -0.912921 | 2.437003  |
| 40 | 1  | -4.653162 | -0.739576 | 2.903647  |
| 41 | 1  | 0.576898  | 1.017754  | -2.059052 |
| 42 | 1  | 0.039517  | -0.492367 | -2.786473 |
| 43 | 6  | 2.881011  | 0.156116  | -1.307907 |
| 44 | 6  | 4.303621  | -0.221721 | -1.042372 |
| 45 | 1  | 4.499294  | -1.287182 | -1.177907 |
| 46 | 1  | 2.676657  | 1.217965  | -1.172976 |
| 47 | 1  | 4.980799  | 0.347805  | -1.689810 |
| 48 | 1  | -1.130908 | 2.477135  | 1.010264  |
| 49 | 6  | 1.991549  | -2.133868 | -1.934219 |
| 50 | 1  | 2.947527  | -2.550053 | -1.613906 |
| 51 | 1  | 1.201688  | -2.690791 | -1.415851 |
| 52 | 1  | 1.876037  | -2.348246 | -3.004614 |
| 53 | 8  | 4.585674  | 0.127833  | 0.344962  |
| 54 | 8  | 5.896993  | 0.520090  | 2.401595  |
| 55 | 15 | 6.111351  | 0.201933  | 0.837464  |
| 56 | 8  | 7.031931  | 1.120481  | 0.125382  |
| 57 | 8  | 6.524694  | -1.360256 | 0.790967  |
| 58 | 1  | 6.317737  | 1.358485  | 2.643473  |
| 59 | 1  | 7.484546  | -1.483057 | 0.741960  |
| 60 | 1  | -2.588159 | -1.560692 | -1.779815 |
| 61 | 1  | -5.658870 | 0.705585  | 2.646186  |

---

**TS (D'-F)**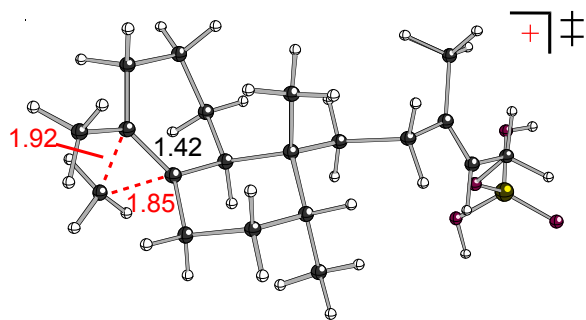

B3LYP/6-31+G(d,p)//B3LYP/6-31+G(d,p):

HF = -1425.9388943 hartrees (-894790.915562193 kcal/mol)

Imaginary Frequencies: 1 (-264.8401 1/cm)

Zero-point correction = 0.539190 (Hartree/Particle)

mPW1PW91/6-31+G(d,p)//B3LYP/6-31+G(d,p):

HF = -1425.6913941 hartrees (-894635.606711691 kcal/mol)

Coordinates (from last standard orientation):

| -----  |        |                         |           |           |
|--------|--------|-------------------------|-----------|-----------|
| Center | Atomic | Coordinates (Angstroms) |           |           |
| Number | Number | X                       | Y         | Z         |
| -----  |        |                         |           |           |
| 1      | 6      | 1.244235                | 2.314069  | -1.447616 |
| 2      | 6      | -1.875816               | 0.712119  | 1.644075  |
| 3      | 6      | 1.898556                | 0.615783  | 0.454719  |
| 4      | 6      | 2.073105                | 2.042667  | -0.176186 |
| 5      | 1      | 0.171581                | 2.222722  | -1.266289 |
| 6      | 6      | 0.394109                | 0.253861  | 0.617082  |
| 7      | 6      | -0.471514               | 1.252851  | 1.421693  |
| 8      | 6      | 2.555031                | -0.447796 | -0.536488 |
| 9      | 1      | -0.064865               | 0.118529  | -0.369075 |
| 10     | 1      | 1.724053                | 2.755126  | 0.580505  |
| 11     | 1      | 1.426077                | 3.337156  | -1.792200 |
| 12     | 1      | 0.326651                | -0.717843 | 1.117186  |
| 13     | 6      | 3.563500                | 2.351432  | -0.414436 |
| 14     | 1      | 4.103221                | 2.405321  | 0.536629  |
| 15     | 1      | 3.673048                | 3.333743  | -0.885594 |
| 16     | 6      | 4.235035                | 1.308134  | -1.331962 |
| 17     | 1      | 5.291189                | 1.548583  | -1.462568 |
| 18     | 1      | 3.770768                | 1.354238  | -2.323147 |
| 19     | 6      | 4.025839                | -0.089971 | -0.775685 |
| 20     | 1      | 2.041972                | -0.277719 | -1.490887 |
| 21     | 6      | 2.378342                | -1.945578 | -0.206440 |
| 22     | 1      | 1.339378                | -2.150743 | 0.056103  |
| 23     | 1      | 2.553685                | -2.520708 | -1.125018 |
| 24     | 6      | 5.062058                | -0.845199 | -0.173743 |

|    |    |           |           |           |
|----|----|-----------|-----------|-----------|
| 25 | 6  | 4.781484  | -2.075063 | 0.675529  |
| 26 | 1  | 5.359458  | -2.908002 | 0.256677  |
| 27 | 1  | 5.265797  | -1.870075 | 1.638689  |
| 28 | 6  | 3.307182  | -2.464020 | 0.896814  |
| 29 | 1  | 2.979694  | -2.084535 | 1.866004  |
| 30 | 1  | 3.230120  | -3.553437 | 0.957853  |
| 31 | 6  | 2.566430  | 0.604934  | 1.853847  |
| 32 | 1  | 3.659344  | 0.563870  | 1.815613  |
| 33 | 1  | 2.309943  | 1.512494  | 2.407664  |
| 34 | 6  | 6.491102  | -0.366715 | -0.070827 |
| 35 | 1  | 6.598779  | 0.136215  | 0.898050  |
| 36 | 1  | 7.181926  | -1.214210 | -0.072329 |
| 37 | 1  | 6.792079  | 0.337289  | -0.844887 |
| 38 | 6  | 4.780258  | -1.214861 | -2.034387 |
| 39 | 1  | 5.142388  | -2.226251 | -1.858458 |
| 40 | 1  | 3.831774  | -1.292157 | -2.564827 |
| 41 | 1  | -0.531977 | 2.210689  | 0.896575  |
| 42 | 1  | -0.005510 | 1.453257  | 2.394521  |
| 43 | 6  | -2.868852 | 1.092409  | 0.822938  |
| 44 | 6  | -4.297847 | 0.654347  | 0.861562  |
| 45 | 1  | -4.518933 | -0.011184 | 1.698298  |
| 46 | 1  | -2.641623 | 1.797228  | 0.023413  |
| 47 | 1  | -4.968408 | 1.519805  | 0.911016  |
| 48 | 1  | 1.486323  | 1.647227  | -2.281905 |
| 49 | 6  | -2.024272 | -0.236646 | 2.809376  |
| 50 | 1  | -2.984042 | -0.754774 | 2.827826  |
| 51 | 1  | -1.238104 | -1.001304 | 2.796174  |
| 52 | 1  | -1.917574 | 0.305801  | 3.757855  |
| 53 | 8  | -4.565625 | -0.061795 | -0.383595 |
| 54 | 8  | -5.854738 | -1.226327 | -2.145612 |
| 55 | 15 | -6.079983 | -0.421927 | -0.767533 |
| 56 | 8  | -7.067282 | 0.682378  | -0.835912 |
| 57 | 8  | -6.409846 | -1.574193 | 0.318260  |
| 58 | 1  | -6.283717 | -0.769064 | -2.883995 |
| 59 | 1  | -7.363024 | -1.685567 | 0.451371  |
| 60 | 1  | 2.225500  | -0.241224 | 2.454971  |
| 61 | 1  | 5.504895  | -0.612632 | -2.573126 |

---

F

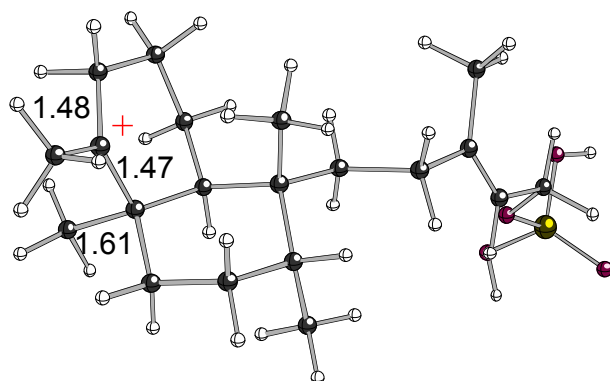

B3LYP/6-31+G(d,p)//B3LYP/6-31+G(d,p):  
HF = -1425.945061 hartrees (-894794.78522811 kcal/mol)  
Imaginary Frequencies: none found  
Zero-point correction = 0.538746 (Hartree/Particle)

mPW1PW91/6-31+G(d,p)//B3LYP/6-31+G(d,p):  
HF = -1425.6964724 hartrees (-894638.793395724 kcal/mol)

Coordinates (from last standard orientation):

| -----  |        |                         |           |           |  |
|--------|--------|-------------------------|-----------|-----------|--|
| Center | Atomic | Coordinates (Angstroms) |           |           |  |
| Number | Number | X                       | Y         | Z         |  |
| -----  |        |                         |           |           |  |
| 1      | 6      | -1.209558               | 2.650235  | -0.117722 |  |
| 2      | 6      | 1.820795                | -0.511375 | -1.701667 |  |
| 3      | 6      | -1.934030               | 0.173621  | -0.624816 |  |
| 4      | 6      | -2.064930               | 1.697662  | -0.976431 |  |
| 5      | 1      | -0.142448               | 2.439328  | -0.211851 |  |
| 6      | 6      | -0.434649               | -0.250363 | -0.571850 |  |
| 7      | 6      | 0.415034                | 0.054277  | -1.828702 |  |
| 8      | 6      | -2.567017               | -0.082538 | 0.803426  |  |
| 9      | 1      | 0.050619                | 0.217818  | 0.292138  |  |
| 10     | 1      | -1.710885               | 1.807746  | -2.008270 |  |
| 11     | 1      | -1.363871               | 3.682314  | -0.449244 |  |
| 12     | 1      | -0.386516               | -1.329733 | -0.395449 |  |
| 13     | 6      | -3.545655               | 2.127285  | -0.969447 |  |
| 14     | 1      | -4.095878               | 1.607320  | -1.762717 |  |
| 15     | 1      | -3.623628               | 3.194563  | -1.204154 |  |
| 16     | 6      | -4.200783               | 1.879981  | 0.392785  |  |
| 17     | 1      | -5.249156               | 2.193072  | 0.381683  |  |
| 18     | 1      | -3.716724               | 2.516371  | 1.140314  |  |
| 19     | 6      | -4.056516               | 0.421888  | 0.897019  |  |
| 20     | 1      | -2.011493               | 0.568656  | 1.487476  |  |
| 21     | 6      | -2.441058               | -1.511030 | 1.380369  |  |
| 22     | 1      | -1.417119               | -1.873137 | 1.269164  |  |

|    |    |           |           |           |
|----|----|-----------|-----------|-----------|
| 23 | 1  | -2.601254 | -1.461802 | 2.462658  |
| 24 | 6  | -5.036537 | -0.550960 | 0.393919  |
| 25 | 6  | -4.835286 | -2.006274 | 0.578854  |
| 26 | 1  | -5.456366 | -2.208319 | 1.476115  |
| 27 | 1  | -5.380223 | -2.541217 | -0.209610 |
| 28 | 6  | -3.404878 | -2.538995 | 0.769874  |
| 29 | 1  | -3.041920 | -2.873004 | -0.204209 |
| 30 | 1  | -3.442424 | -3.433914 | 1.397969  |
| 31 | 6  | -2.633584 | -0.644503 | -1.737209 |
| 32 | 1  | -3.729330 | -0.644739 | -1.658196 |
| 33 | 1  | -2.412913 | -0.228933 | -2.724789 |
| 34 | 6  | -6.340250 | -0.129780 | -0.167792 |
| 35 | 1  | -6.155431 | 0.230607  | -1.192535 |
| 36 | 1  | -7.061365 | -0.947026 | -0.219396 |
| 37 | 1  | -6.765388 | 0.726100  | 0.364667  |
| 38 | 6  | -4.519197 | 0.450402  | 2.438694  |
| 39 | 1  | -4.540272 | -0.526142 | 2.919652  |
| 40 | 1  | -3.774853 | 1.072344  | 2.942916  |
| 41 | 1  | 0.477559  | 1.133921  | -1.992032 |
| 42 | 1  | -0.066557 | -0.373392 | -2.717443 |
| 43 | 6  | 2.823897  | 0.295915  | -1.317157 |
| 44 | 6  | 4.258857  | -0.069408 | -1.109071 |
| 45 | 1  | 4.479084  | -1.108235 | -1.362557 |
| 46 | 1  | 2.600682  | 1.344066  | -1.119689 |
| 47 | 1  | 4.913779  | 0.584705  | -1.695926 |
| 48 | 1  | -1.450468 | 2.616187  | 0.949556  |
| 49 | 6  | 1.963096  | -1.977458 | -2.033670 |
| 50 | 1  | 2.934717  | -2.391076 | -1.760261 |
| 51 | 1  | 1.196876  | -2.573466 | -1.523044 |
| 52 | 1  | 1.820875  | -2.139585 | -3.110124 |
| 53 | 8  | 4.555466  | 0.133293  | 0.306715  |
| 54 | 8  | 5.889772  | 0.361564  | 2.378201  |
| 55 | 15 | 6.083785  | 0.177019  | 0.789209  |
| 56 | 8  | 6.992286  | 1.157475  | 0.146870  |
| 57 | 8  | 6.509707  | -1.373232 | 0.615860  |
| 58 | 1  | 6.272647  | 1.200169  | 2.675569  |
| 59 | 1  | 7.470518  | -1.481521 | 0.554429  |
| 60 | 1  | -2.305208 | -1.686431 | -1.748299 |
| 61 | 1  | -5.496784 | 0.926809  | 2.539754  |

---
